# Supplementary material for: A Metagenomics Transect into the Deepest Point of the Baltic Sea Reveals Clear Stratification of Microbial Functional Capacities
Source: PubMed Central journal article supplement (PMC3781128; doi:10.1371/journal.pone.0074983), 2013-09-23

10m 75m

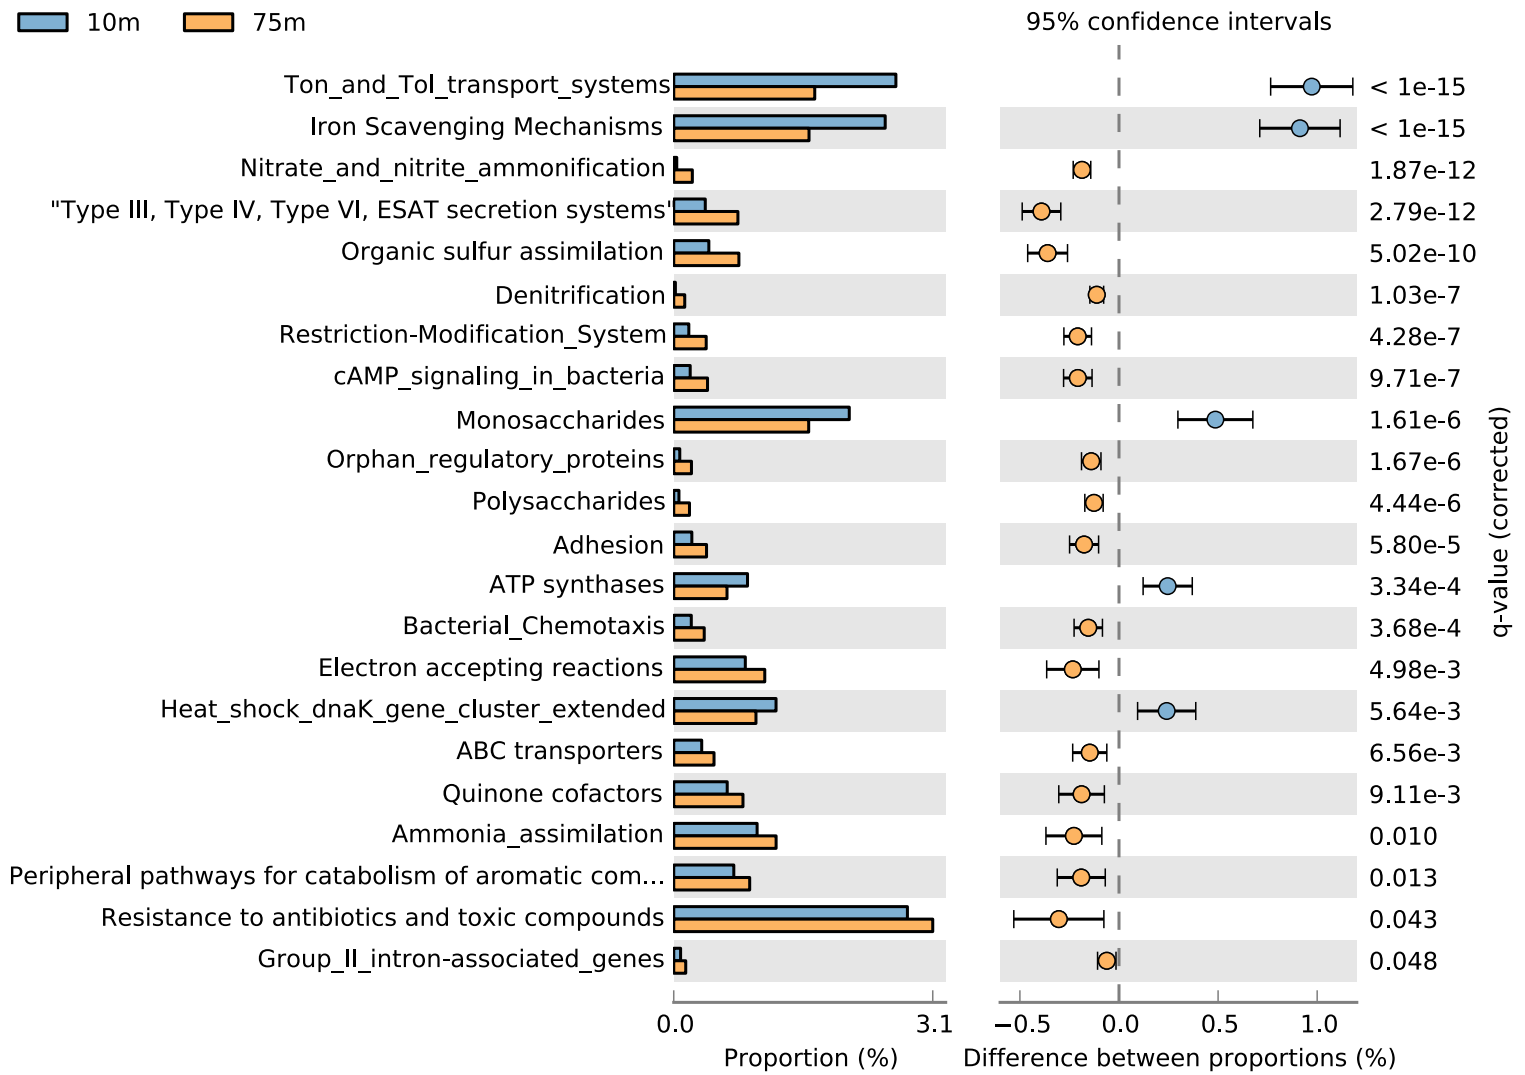

10m 400m

95% confidence intervals

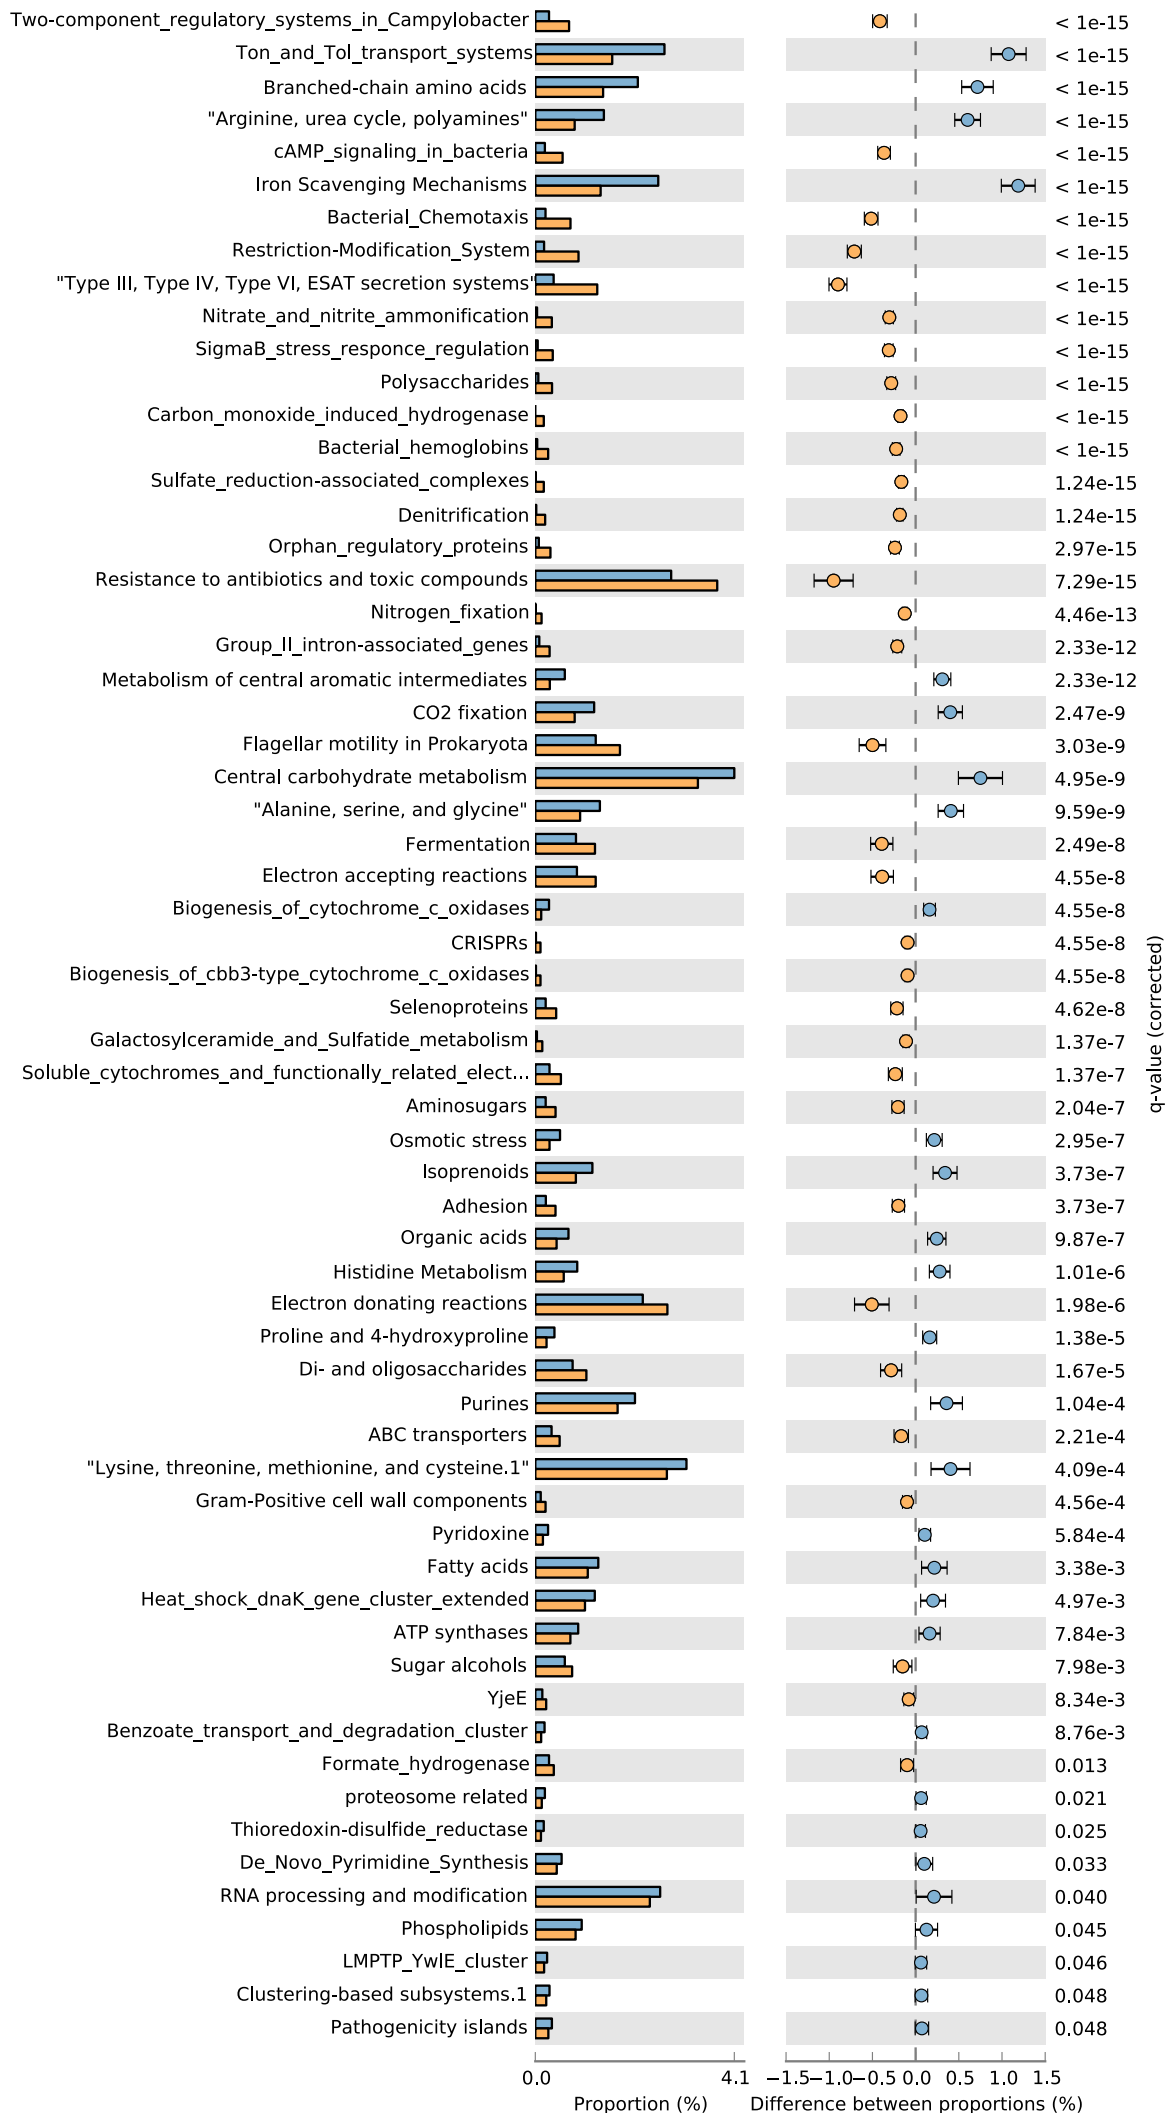

10m sediment

95% confidence intervals

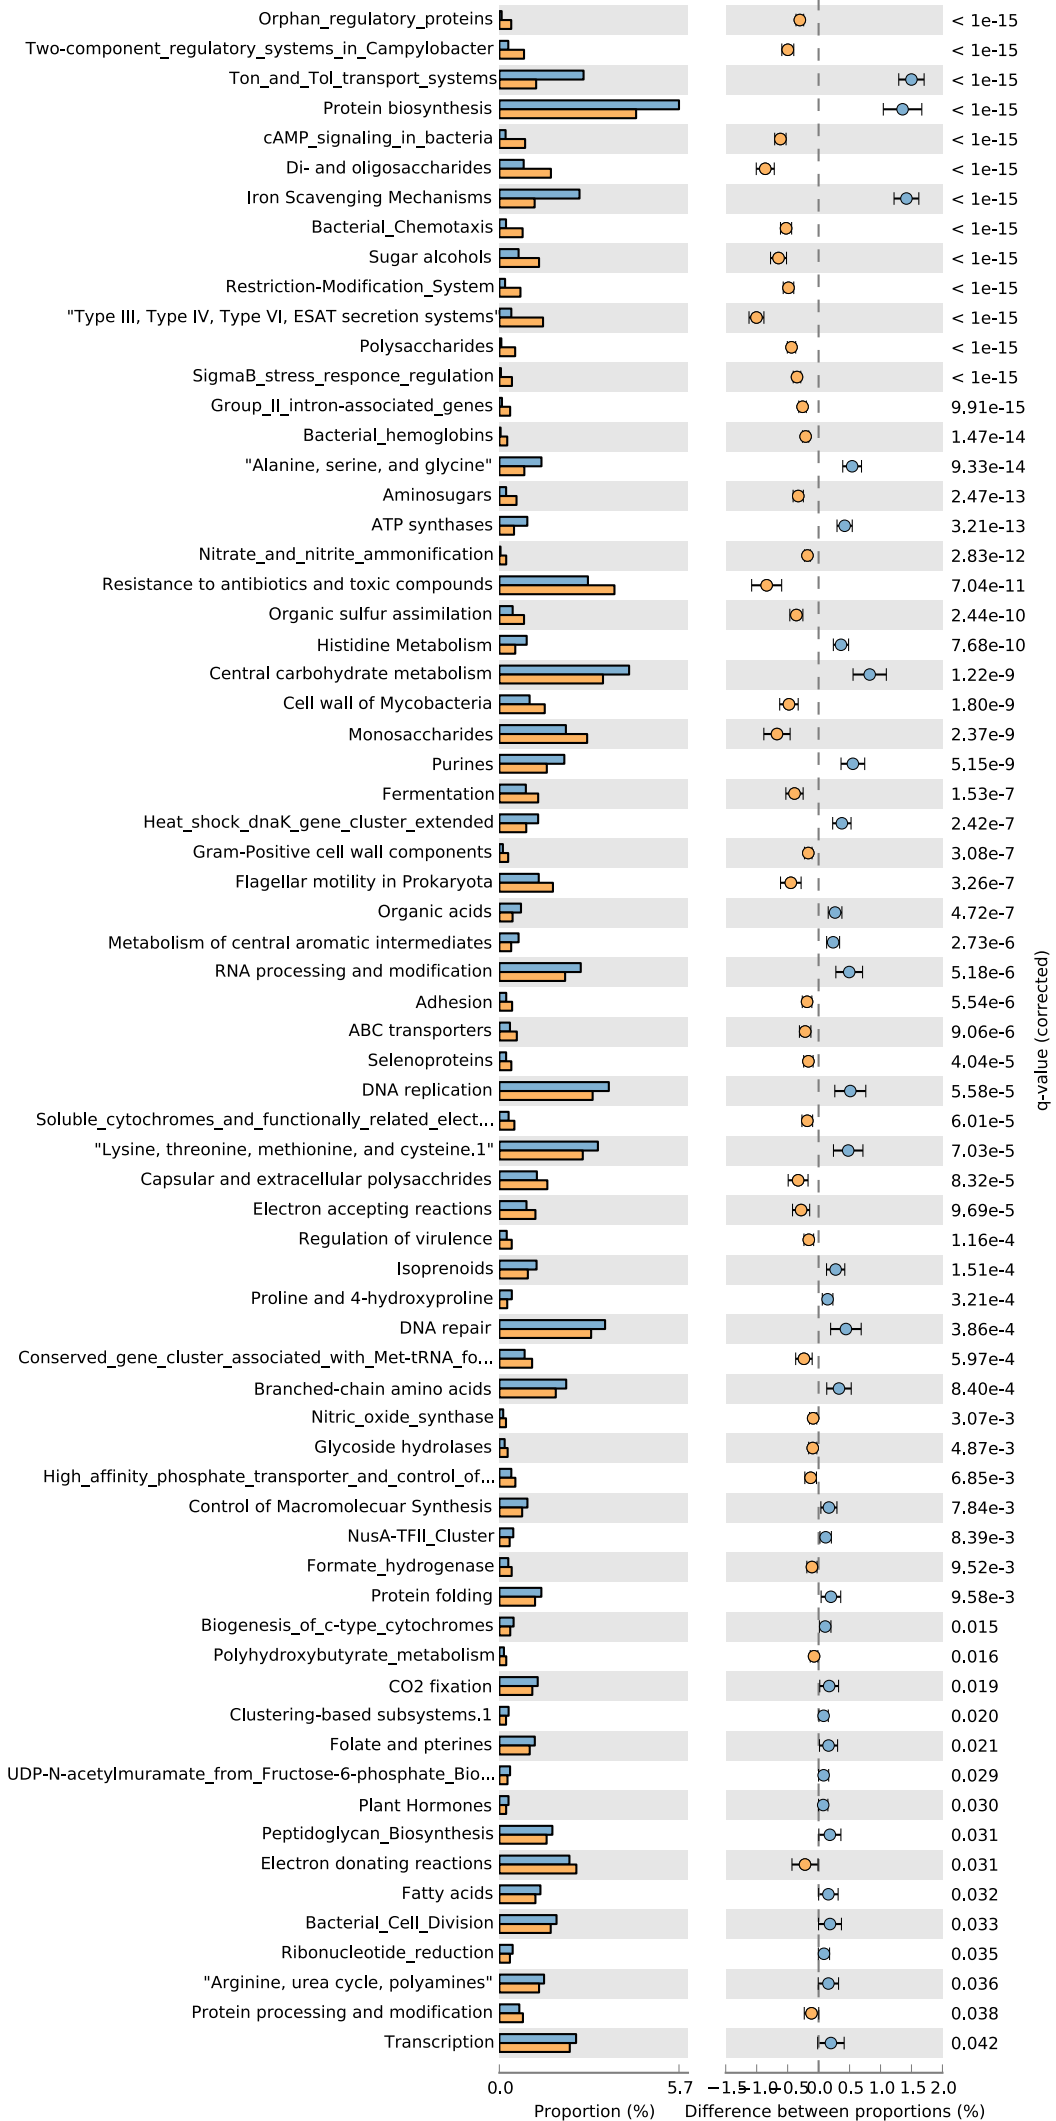

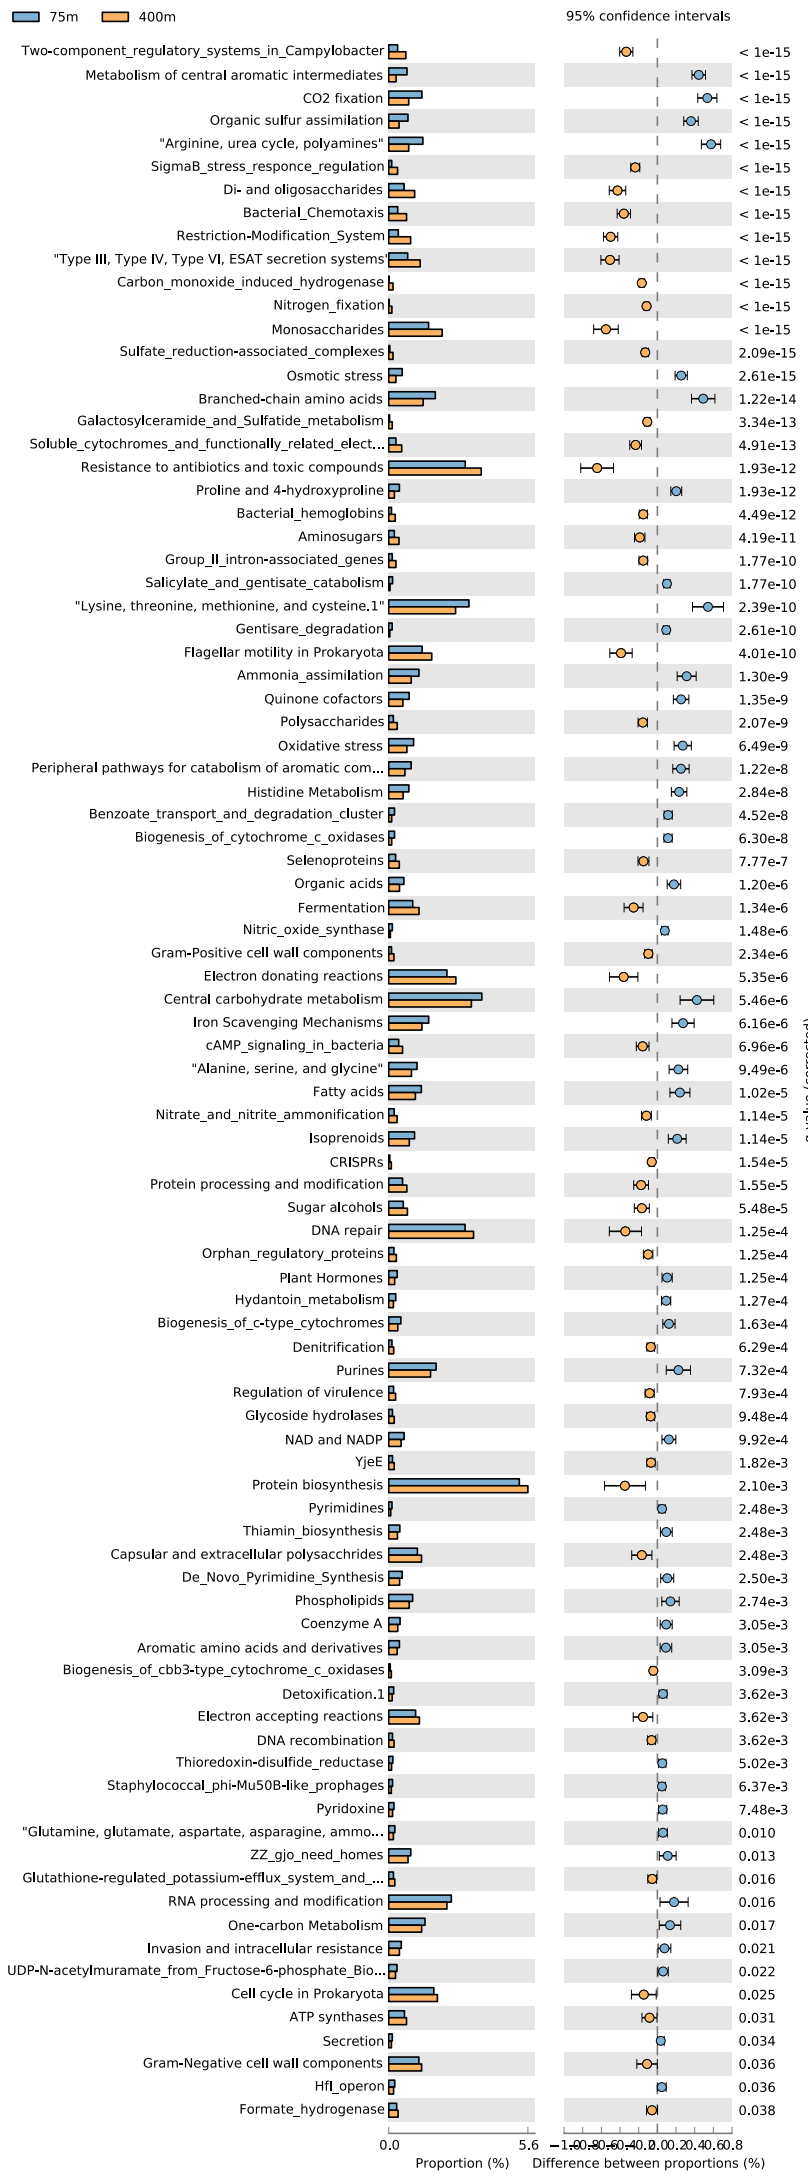

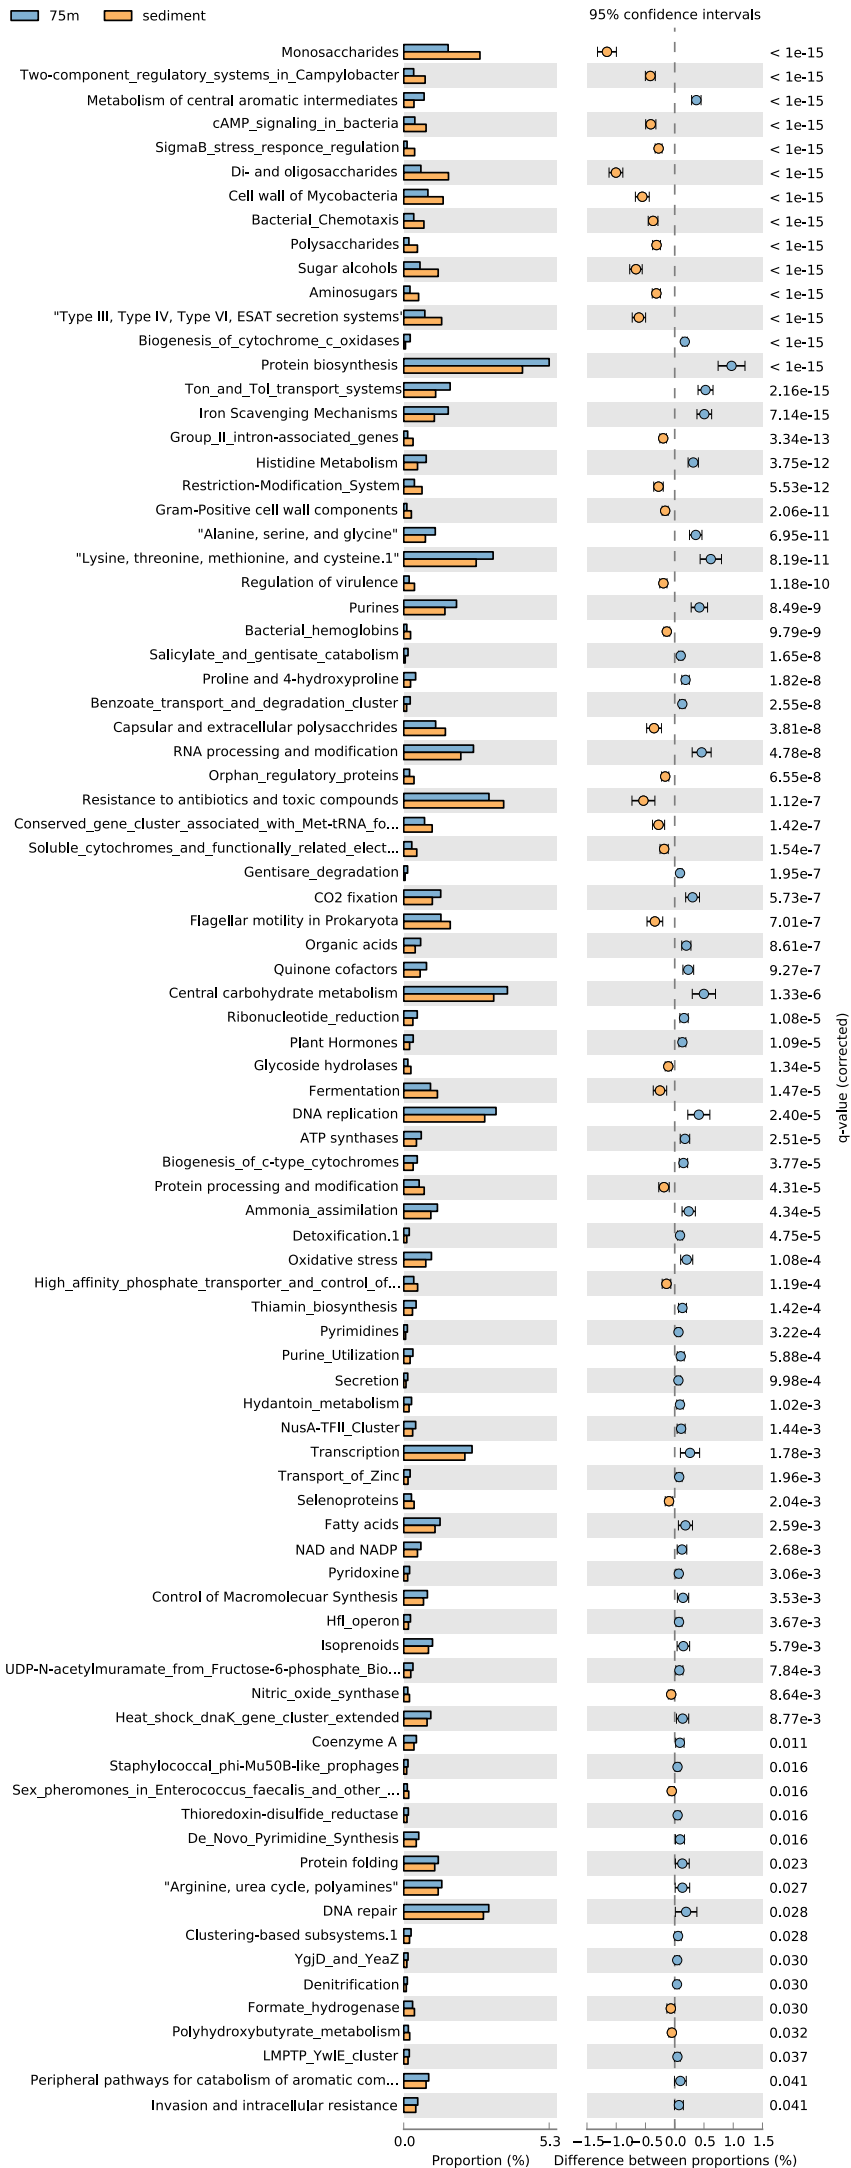

400m sediment

95% confidence intervals

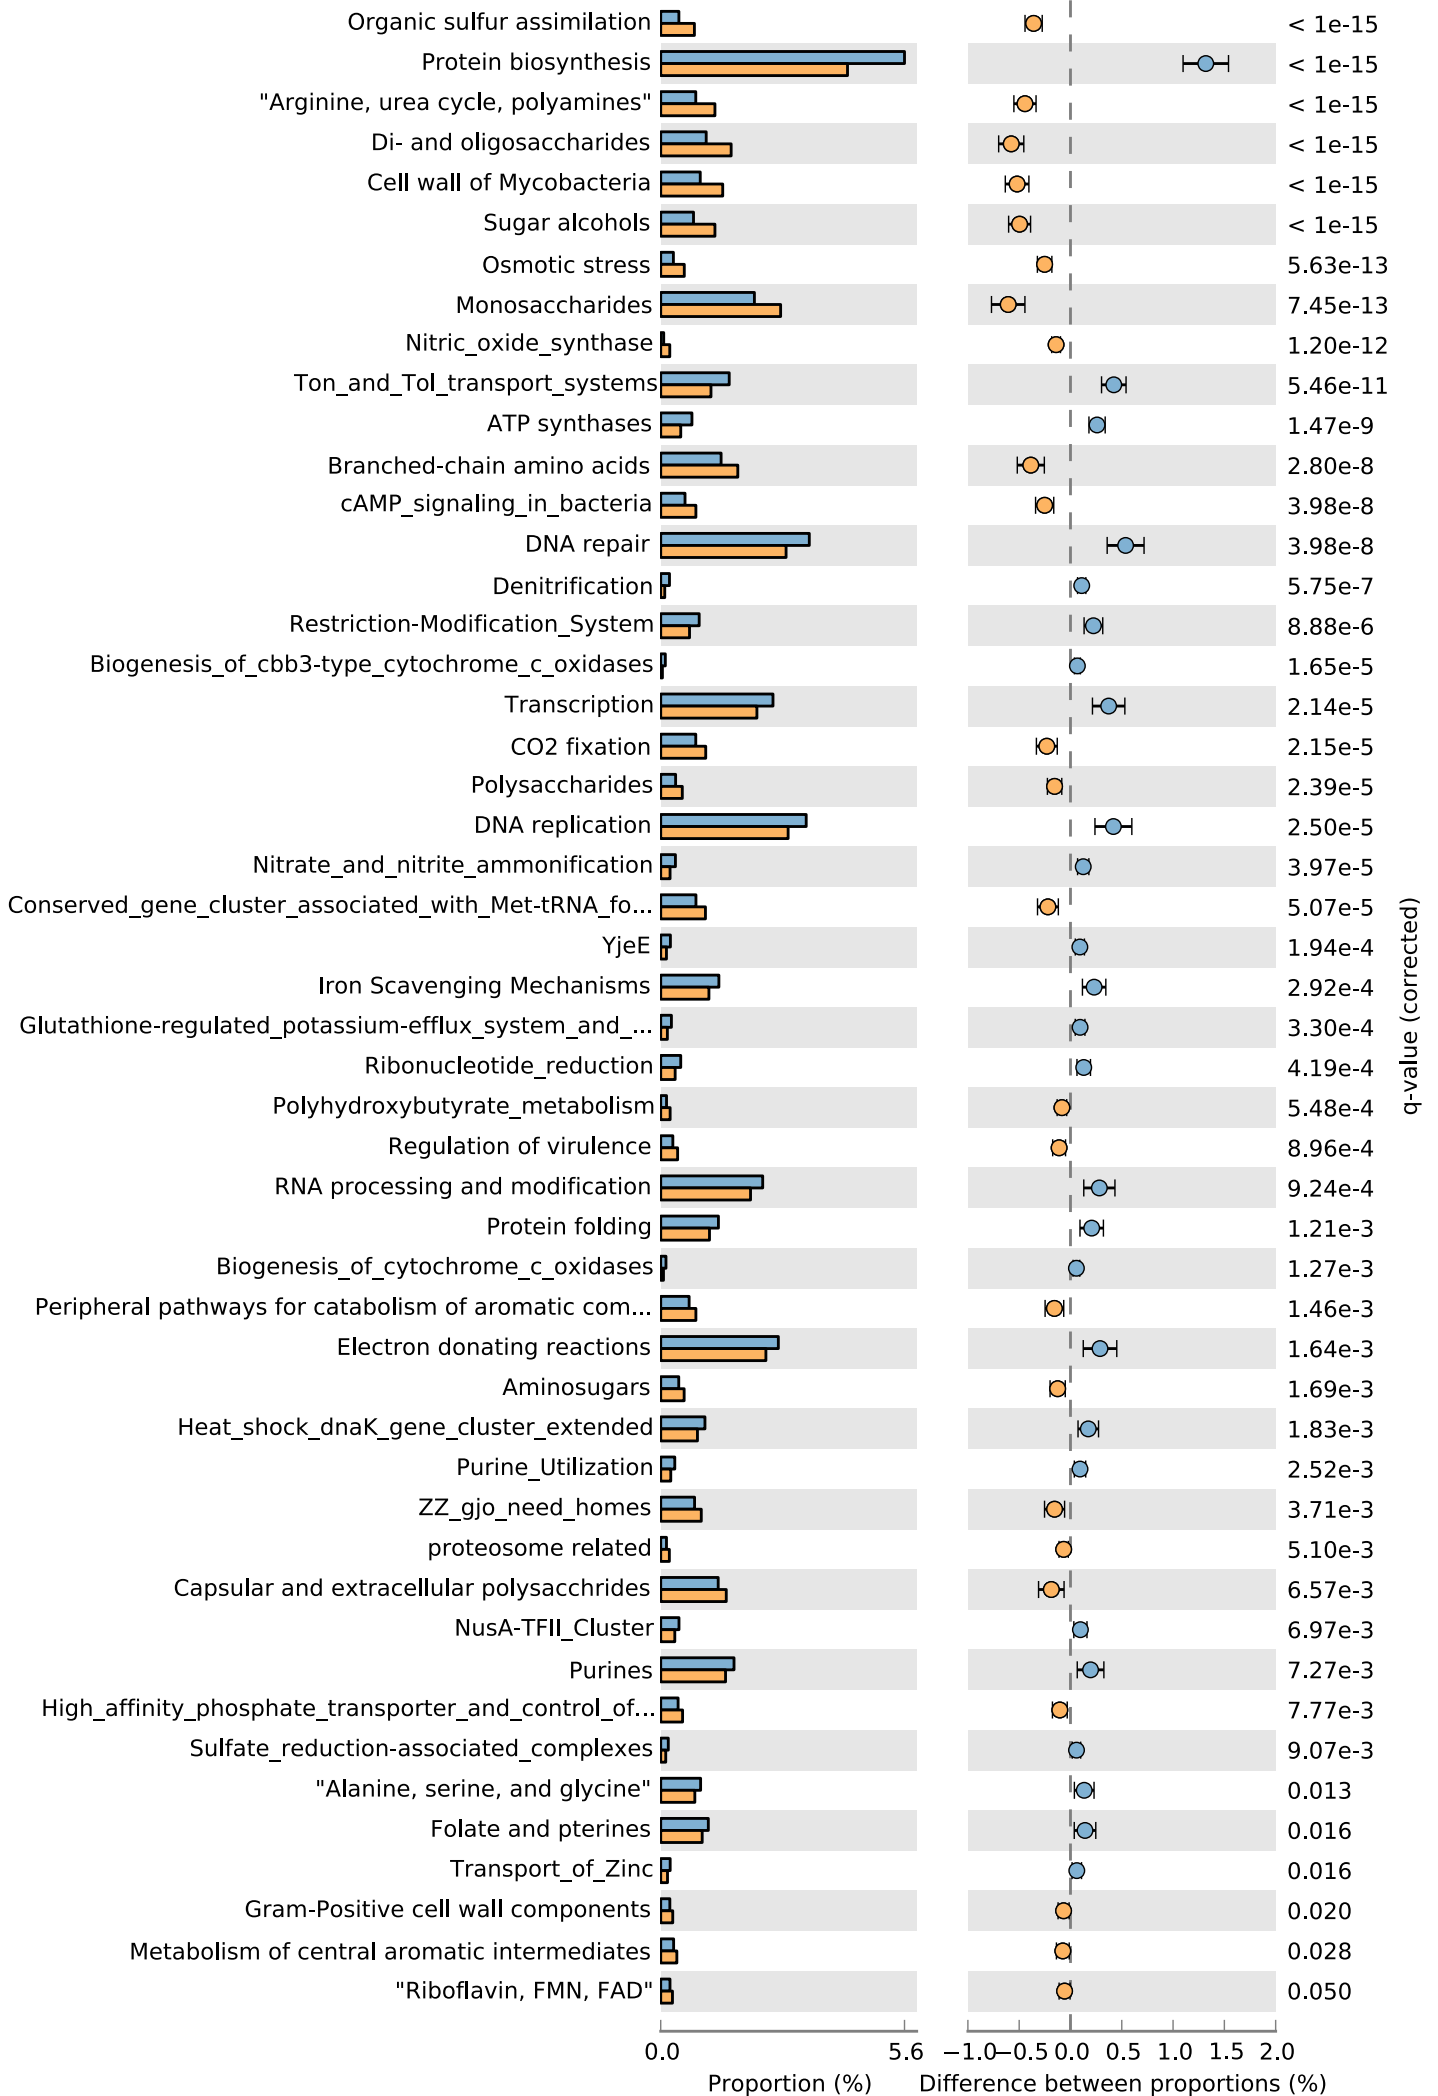

Supplement: pone.0074983.s001.pdf [file pone.0074983.s001.pdf]
