# Supplementary material for: A Metagenomics Transect into the Deepest Point of the Baltic Sea Reveals Clear Stratification of Microbial Functional Capacities
Source: PubMed Central journal article supplement (PMC3781128; doi:10.1371/journal.pone.0074983), 2013-09-23
Supplement: pone.0074983.s003.pdf [file pone.0074983.s003.pdf]

0.0  
Landsoort Deep 400m  
Landsoort Deep sediment 466m  
Harmara Sea 1300m sediment  
BATS216 500m  
Chile OMZ 150m  
Chile OMZ 200m  
Chile OMZ 70m  
Chile OMZ 80m  
Landsoort Deep 10m  
Landsoort Deep 75m  
Harmara Sea 1000m plankton  
Western channel april day 2m  
Western channel aug 4pm 2m  
Western channel jan day 2m  
BATS216 20m  
BATS216 100m  
BATS216 50m  
Mediterranean DCN 50m  
Puerto Rico Trench 6000m  
Tonya seep sediment 0-4 cm  
Tonya seep sediment 10-15 cm  
1000.0

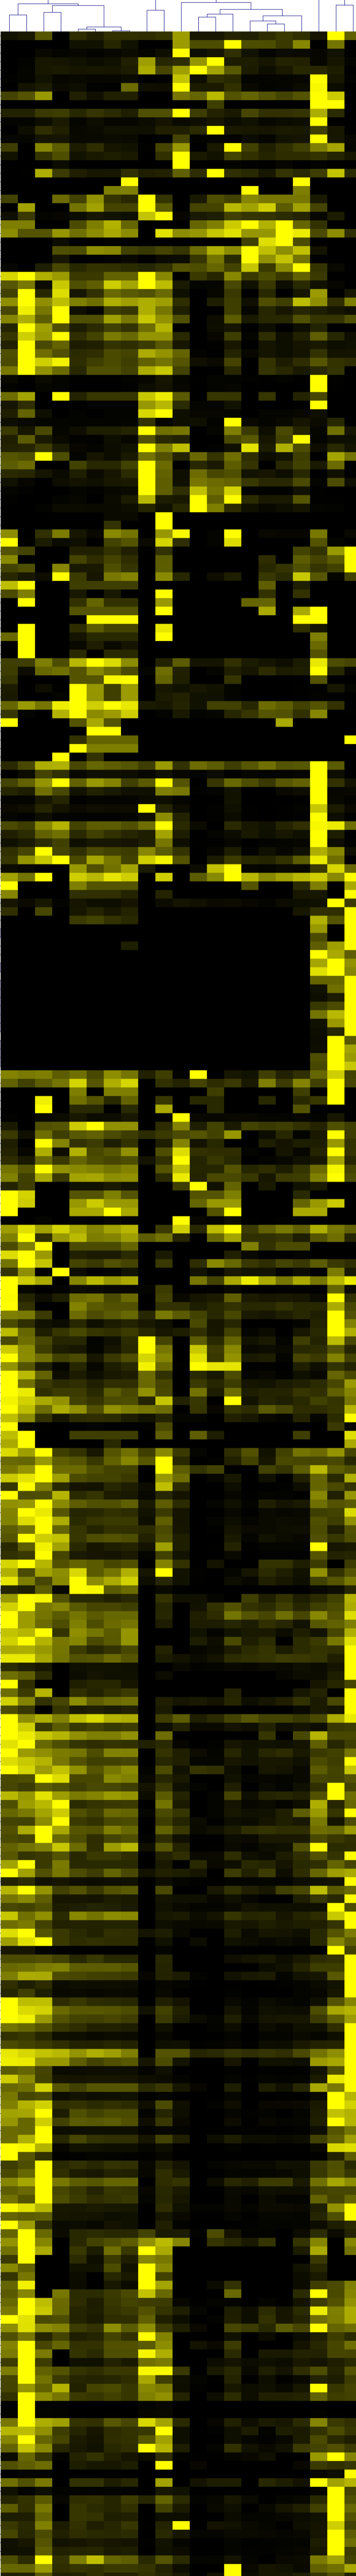

- Alteromonadales genera incertae sedis
- Blattabacteriaceae
- Pseudoalteromonadaceae
- OMG group
- Rhodobacteraceae
- Alcanivoracaceae
- Erythrobacteraceae
- Farvularculaceae
- Rickettsiales genera incertae sedis
- Aurantimonadaceae
- Brucellaceae
- Hyphomonadaceae
- Halomonadaceae
- Enterobacteriaceae
- Idiomarinaceae
- Alteromonadaceae
- unclassified Gammaproteobacteria (miscellaneous)
- Bacillales Family XI. Incertae Sedis
- Entomoplasmatales
- Anaplasmataceae
- Bartonellaceae
- Rickettsiaceae
- Mycoplasmataceae
- Francisellaceae
- Fruchtlorococcaceae
- SAR11 cluster
- SAR86 cluster
- unclassified Alphaproteobacteria
- Bifidobacteriaceae
- Acidimicrobiaceae
- Corynebacteriaceae
- Streptococcaceae
- Catenulisporaceae
- Nocardiopsaceae
- Geodermatophilaceae
- Frankiaceae
- Nocardiaceae
- Nocardioidaceae
- Streptosporangiaceae
- Thermomonosporaceae
- Caulobacteraceae
- Sphingomonadaceae
- Brevibacteriaceae
- Microbacteriaceae
- unclassified Actinobacteria
- Moraxellaceae
- Pasteurellaceae
- Chroococcales
- Punicicoccaceae
- unclassified Betaproteobacteria
- Enterococcaceae
- unclassified Flavobacteriales
- Flavobacteriaceae
- unclassified Methylophilales
- unclassified Flavobacteria
- unclassified Rhodobacterales
- Dermabacteraceae
- Jonesiaceae
- Cenarchaeaceae
- Nitrosopumilaceae
- Ferroplassmaceae
- Methanopyraceae
- Thermoplasmataceae
- unclassified Euryarchaeota
- Aerococcaceae
- Carnobacteriaceae
- Tsukamurellaceae
- Leuconostocaceae
- Picrophilaceae
- Dermacoccaceae
- Promicromonosporaceae
- Gordoniaceae
- Segnilliparaceae
- Aeromonadaceae
- Rhodospirillaceae
- Nitrospiraceae
- sulfur-oxidizing symbionts
- unclassified Oceanospirillales
- Leptospiaceae
- SAR406 cluster
- unclassified Bacteroidales
- Acidilobaceae
- Pyrodictiaceae
- unclassified Synergistetes
- unclassified Thaumarchaeota
- Phyllobacteriaceae
- Rhizobiaceae
- Acetobacteraceae
- Methylbacteriaceae
- Burkholderiaceae
- Comamonadaceae
- Pseudomonadaceae
- Oxalobacteraceae
- Bradyrhizobiaceae
- Alcaligenaceae
- Burkholderiales Genera incertae sedis
- Xanthobacteraceae
- Flammeovirgaceae
- Staphylococcaceae
- Acidaminococcaceae
- Methanothermaceae
- Piscirickettsiaceae
- Thermodesulfobiaceae
- Clostridiales Family XVII. Incertae Sedis
- Planococcaceae
- unclassified Archaea
- Thermoactinomycetaceae
- Salinisphaeraceae
- Cryomorphaceae
- Simkaniaceae
- Stigonematales
- Anaerolineaceae
- Desulfurellaceae
- Desulfurobacteriaceae
- Oscillospiraceae
- Thermoanaerobacterales Family IV. Incertae Sedis
- Thermodesulfobacteriaceae
- Haloplasmataceae
- Marinilabiaceae
- Saprosiraceae
- unclassified Bacilli
- Bdellovibrionaceae
- Bacteriovoracaceae
- unclassified Vibrionales
- Halothobacillaceae
- unclassified Burkholderiales (miscellaneous)
- Oceanospirillaceae
- Reinekea
- Methylophilaceae
- Ferrimonadaceae
- Colwelliaceae
- Shewanellaceae
- Moritellaceae
- Vibrionaceae
- Chlamydiaceae
- Bacillales Family XII. Incertae Sedis
- Listeriaceae
- Peptostreptococcaceae
- unclassified Alteromonadales
- Coxiellaceae
- Legionellaceae
- Cardiobacteriaceae
- unclassified Thermotogales
- Waddliaceae
- Acholeplasmataceae
- Clostridiales Family XI. Incertae Sedis
- Helicobacteraceae
- Campylobacteraceae
- Nautiliaceae
- Psychromonadaceae
- Porphyromonadaceae
- Rikenellaceae
- Cyclobacteriaceae
- Chitinophagaceae
- Cytophagaceae
- Sphingobacteriaceae
- Bacteroidaceae
- Provotellaceae
- unclassified Bacteroidetes
- Bacillaceae
- Brachyspiraceae
- Methanococcaceae
- unclassified Campylobacterales (Sulfurimonas gotlandica)
- Methanocorpusculaceae
- unclassified Thiotrichales
- Lentisphaeraceae
- unclassified Verrucomicrobiales
- Beijerinckiacae
- Alicyclobacillaceae
- Planctomycetaceae
- Dehalococcoidetes
- Cystobacteraceae
- Chloroflexaceae
- Ktedonobacteraceae
- Acidobacteriaceae
- Rubrobacteraceae
- Gemmatimonadaceae
- Solibacteraceae
- Methylacidiphilaceae
- Rhodothermaceae
- Chlorobiaceae
- unclassified Planctomycetales
- Oscillochloridaceae
- Eubacteriaceae
- Hydrogenothermaceae
- Elusimicrobiaceae
- Halobacteroidaceae
- Natronaerobiaceae
- Dictyoglomaceae
- Thermoanaerobacterales Family III. Incertae Sedis
- Methanocaldococcaceae
- Methanospirillaceae
- Nanarchaeota
- Thermofilaceae
- Halanaerobiaceae
- Korarchaeota
- Aquificaceae
- unclassified Clostridiales
- Helicobacteriaceae
- Ruminococcaceae
- Fibrobacteraceae
- Thermoanaerobacteraceae
- unclassified Bacteria
- Nitrospiraceae
- Gallionellaceae
- unclassified Proteobacteria
- Sphaerobacteraceae
- Halobacteriaceae
- Thermomicrobiaceae
- Trueperaceae
- Nannocystaceae
- Verrucomicrobia subdivision 3
- Sulfobacterales
- Erysipelotrichaceae
- Fusobacteriaceae
- Methanobacteriaceae
- Coriobacteriaceae
- unclassified Methanomicrobiales
- Desulfuromonadaceae
- Deferribacteraceae
- Thermotogaceae
- Clostridiaceae
- Desulfomicrobiaceae
- unclassified Epsilonproteobacteria
- Desulfurococcaceae
- Thermoproteaceae
- Synergistaceae
- Archaeoglobaceae
- Methanosarcinaceae
- Desulfarculaceae
- Desulfovibrionaceae
- Syntrophomonadaceae
- Methanocellaceae
- Methanomicrobiaceae
- Thermococcaceae
- Veillonellaceae
- Paenibacillaceae
- Syntrophaceae
- Spirochaetaceae
- Thermaceae
- Desulfobulbaceae
- Felobacteriaceae
- Geobacteraceae
- Thiotrichaceae
- Syntrophobacteraceae
- unclassified Cyanobacteria
- Desulfobacteraceae
- unclassified Deltaproteobacteria (deltaproteobacterium NaphS2)
- Haliangiaceae
- Polyangiaceae
- Gloebacteria
- Myxococcaceae
- unclassified Acidobacteria
- Desulfobalobacteriaceae
- Peptococcaceae
- Victivallaceae
- Parachlamydiaceae
- Actinomycesaceae
- Actinosynnemataceae
- Kineosporiaceae
- Cellulomonadaceae
- Sanguibacteraceae
- Intrasporangiaceae
- Propionibacteriaceae
- Herpetosiphonaceae
- Deinococcaceae
- Lactospiraceae
- Lactobacillaceae
- Acidothermaceae
- Beutenbergiaceae
- Glycomycetaceae
- Nakamurellaceae
- Micrococcaceae
- Nostocaceae
- Pseudonocardiaceae
- Micromonosporaceae
- Conexibacteraceae
- Mycobacteriaceae
- Streptomycetaceae
- Opitutaceae
- Spartobacteria
- Verrucomicrobiaceae
- Hyphomicrobiaceae
- Clostridiales Family XVIII. Incertae Sedis
- Methanosetaeaceae
- Methylocystaceae
- Methylcoccaceae
- Nitrosomonadaceae
- Acidithiobacillaceae
- Hydrogenophilaceae
- Haliangaceae
- Mariprofundaceae
- Chromatiaceae
- Ectothiorhodospiraceae
- Rhodocyclaceae
- Oscillatoriales
- Neisseriaceae
- Xanthomonadaceae
