# Supplementary material for: A Metagenomics Transect into the Deepest Point of the Baltic Sea Reveals Clear Stratification of Microbial Functional Capacities
Source: PubMed Central journal article supplement (PMC3781128; doi:10.1371/journal.pone.0074983), 2013-09-23

■ Landsort Deep 400 m + sediment, Marmara Sea sediment, Tonya Seep sediment 0-4 + 10-15 cm, (n = 5)

■ All other marine metagenomes (n = 20)

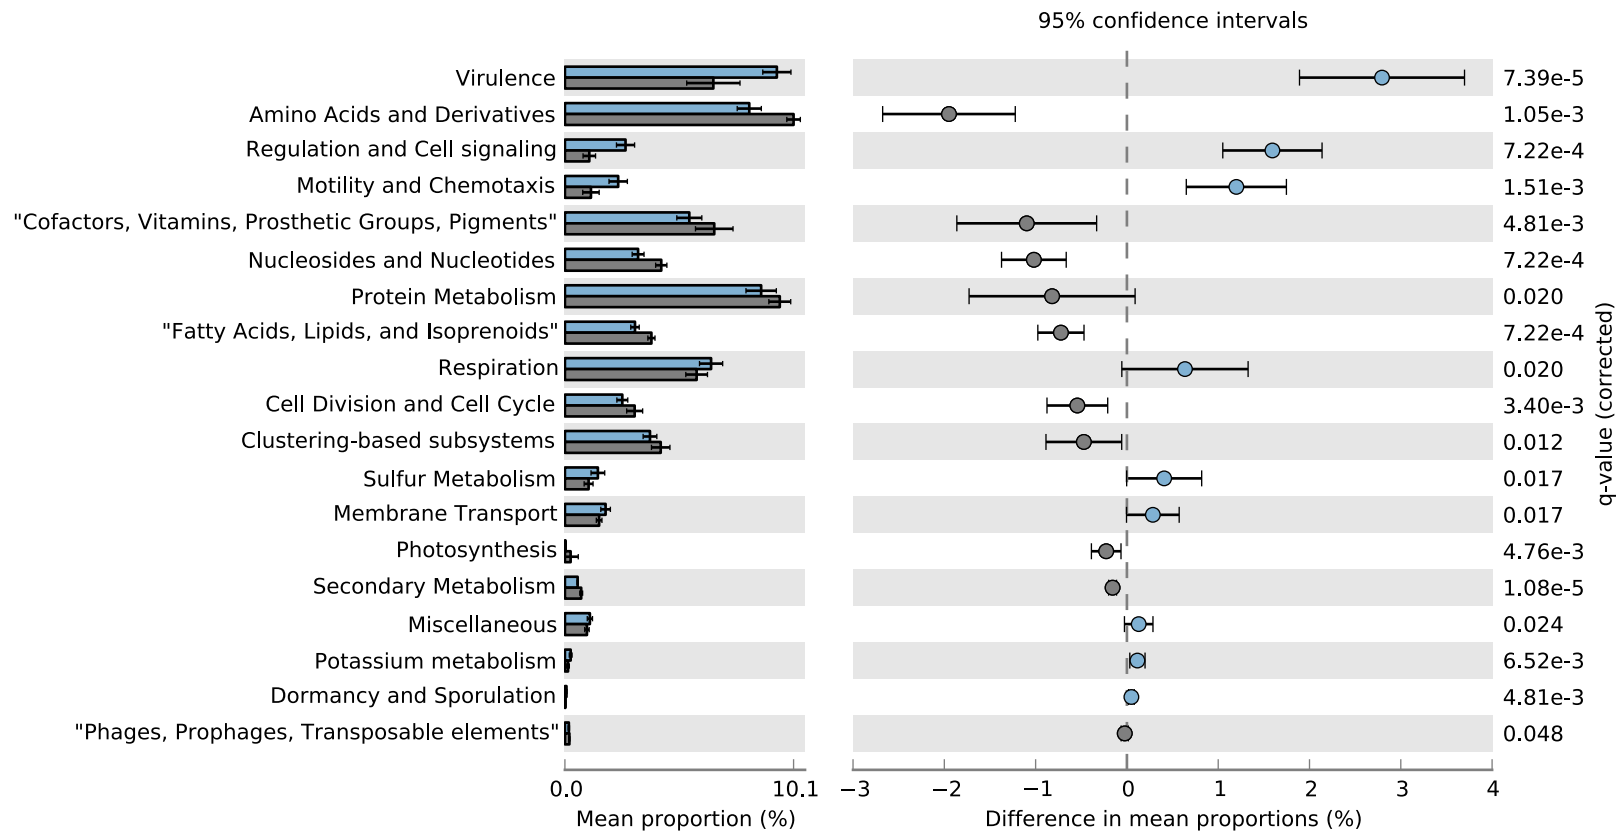

Supplement: pone.0074983.s004.pdf [file pone.0074983.s004.pdf]
