# Supplementary material for: A Metagenomics Transect into the Deepest Point of the Baltic Sea Reveals Clear Stratification of Microbial Functional Capacities
Source: PubMed Central journal article supplement (PMC3781128; doi:10.1371/journal.pone.0074983), 2013-09-23

**A** Cobalt-zinc-cadmium resistance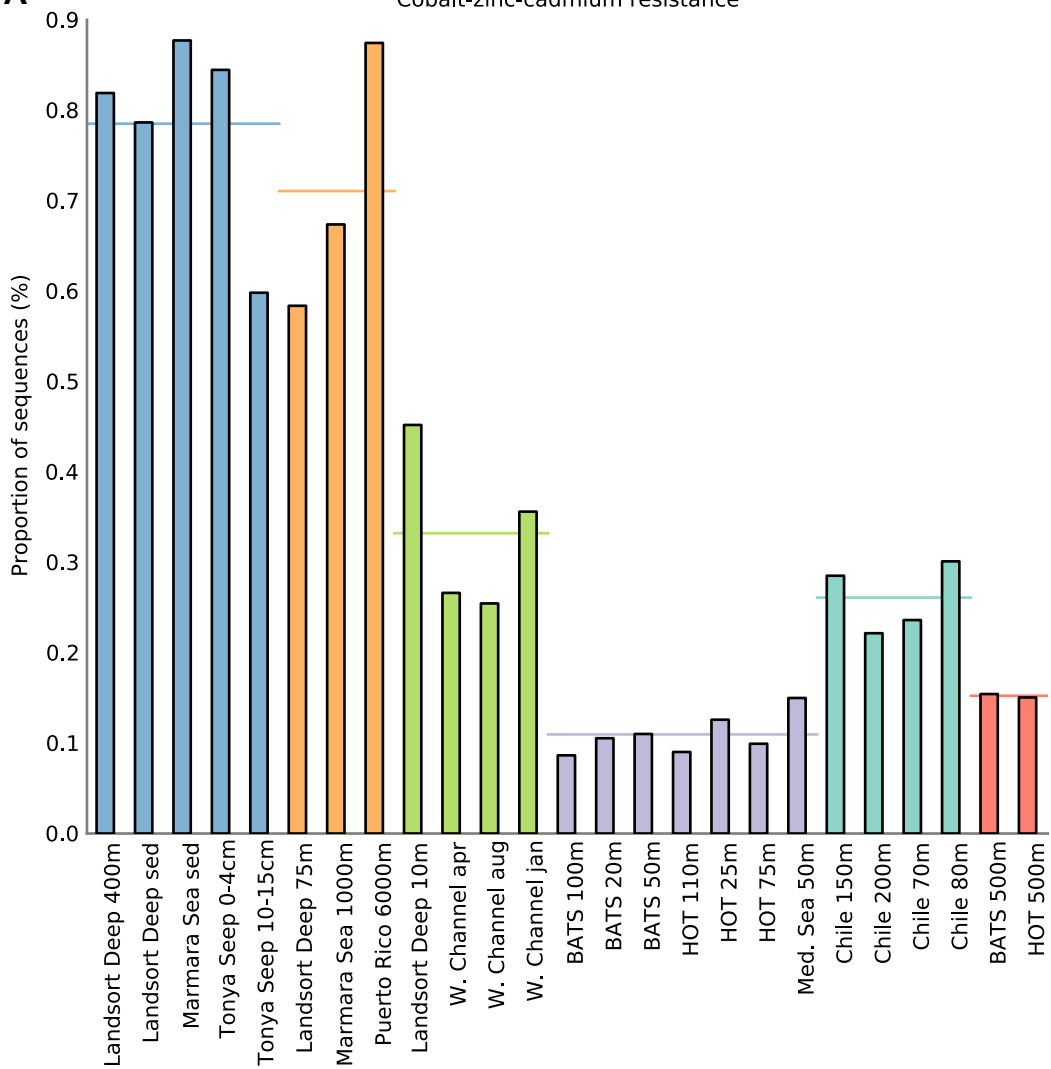**B** Integrons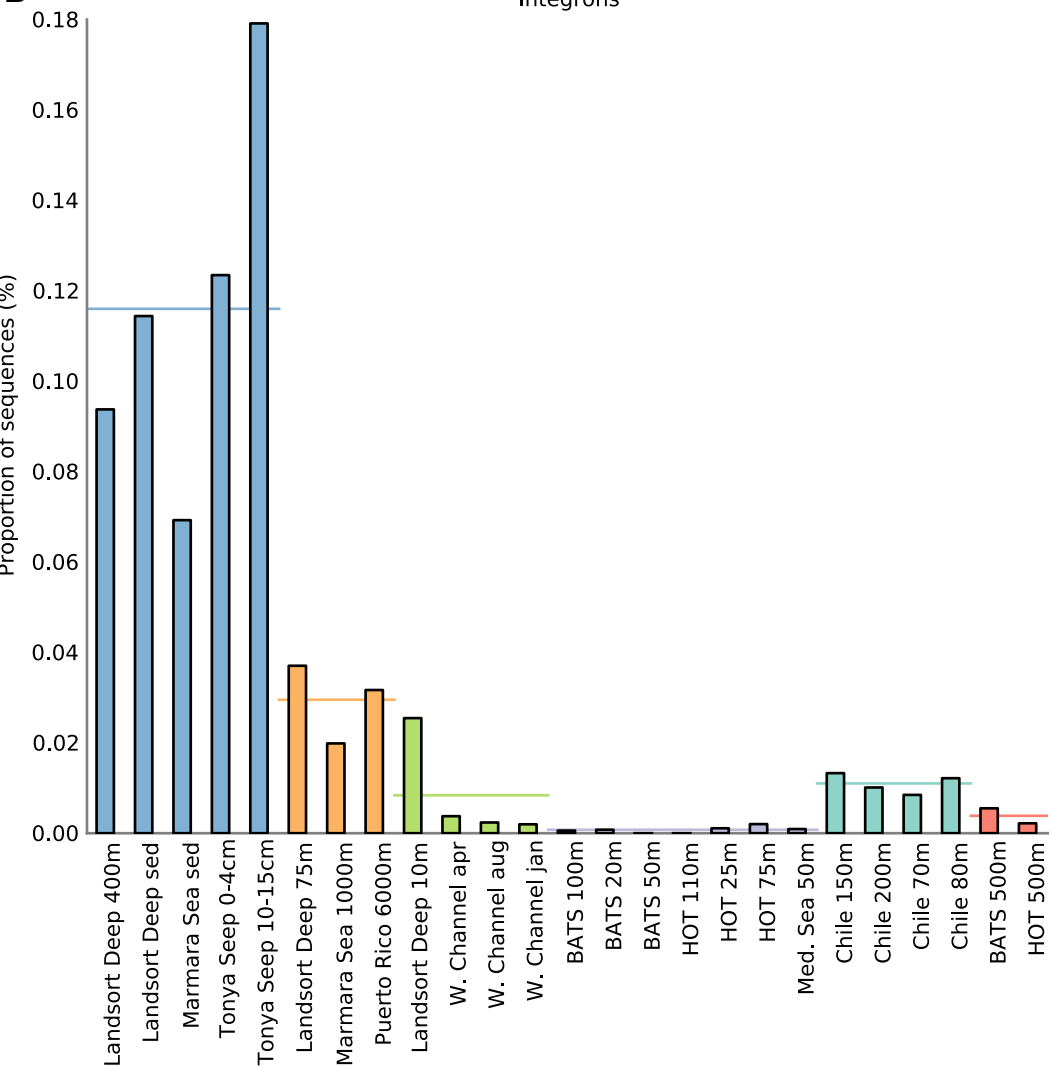

Supplement: pone.0074983.s006.pdf [file pone.0074983.s006.pdf]
