# Supplementary material for: A Metagenomics Transect into the Deepest Point of the Baltic Sea Reveals Clear Stratification of Microbial Functional Capacities
Source: PubMed Central journal article supplement (PMC3781128; doi:10.1371/journal.pone.0074983), 2013-09-23
Supplement: pone.0074983.s007.pdf [file pone.0074983.s007.pdf]

| Depth (m)       | Temp. (°C) | Salinity (psu) | O <sub>2</sub> (mL/L) | H <sub>2</sub> S (µM) | PO <sub>4</sub> <sup>3-</sup> (µM) | Total P (µM) | NO <sub>3</sub> <sup>-</sup> /NO <sub>2</sub> <sup>-</sup> (µM) | NH <sub>4</sub> <sup>+</sup> (µM) | Total N (µM) | SiO <sub>4</sub> <sup>-</sup> (µM) | Chl a (µg/L) | pH  | DOC (ug/L) |
|-----------------|------------|----------------|-----------------------|-----------------------|------------------------------------|--------------|-----------------------------------------------------------------|-----------------------------------|--------------|------------------------------------|--------------|-----|------------|
| 0               | 3.99       | 6.56           | 10.71                 |                       | 0.22                               | 0.8          | 0.02                                                            | 0.04                              | 21.24        | 10.4                               | 4.5          |     |            |
| 5               | 3.96       | 6.52           |                       |                       | 0.22                               | 0.8          | 0                                                               | 0.04                              | 21.37        | 10.3                               | 3.59         |     |            |
| 10              | 4.1        | 6.55           |                       |                       | 0.22                               | 0.79         | 0                                                               | 0.04                              | 20.37        | 10.3                               | 3.18         |     | 3.9        |
| 15              | 3.47       | 6.66           |                       |                       | 0.2                                | 0.74         | 0                                                               | 0.04                              | 20.37        | 9.5                                | 2.2          |     |            |
| 20              | 3.04       | 6.70           | 9.78                  |                       | 0.32                               | 0.7          | 0.02                                                            | 0.04                              | 18.75        | 10.8                               | 1.02         |     |            |
| 25              | 2.43       | 6.78           |                       |                       | 0.33                               | 0.69         | 0                                                               | 0.05                              | 18.42        | 11.3                               |              |     |            |
| 30              | 2.9        | 6.84           |                       |                       | 0.49                               | 0.87         | 0                                                               | 0.04                              | 18.46        | 13.6                               |              |     |            |
| 40              | 2.46       | 6.94           | 9.26                  |                       | 0.65                               | 0.9          | 3.61                                                            | 0.05                              | 20.55        | 14.3                               | 0.86         |     |            |
| 50              | 2.74       | 7.03           |                       |                       | 0.65                               | 0.9          | 3.8                                                             | 0.08                              | 20.94        | 13.6                               | 0.77         |     |            |
| 60              | 3.02       | 7.15           | 9.03                  |                       | 0.66                               | 0.9          | 4.06                                                            | 0.07                              | 20.9         | 13.6                               | 0.55         |     |            |
| 70              | 4.24       | 7.92           | 6.55                  |                       | 1.29                               | 1.5          | 4.88                                                            | 0.08                              | 21.35        | 22.3                               |              |     |            |
| 80              | 5.23       | 9.56           | 1.36                  |                       | 3.05                               | 3.2          | 4.68                                                            | 0.11                              | 19.67        | 47                                 | 0.2          | 7.3 | 3.4        |
| 90              | 5.38       | 10.02          | 0.69                  |                       | 3.25                               | 3.5          | 0.25                                                            | 2.6                               | 18.26        | 52                                 |              |     |            |
| 100             | 5.49       | 10.27          | -0.23                 | 5.3                   | 3.7                                | 3.93         | 0.02                                                            | 4.55                              | 19.71        | 53.8                               |              |     |            |
| 125             | 5.6        | 10.53          | -0.65                 | 14.5                  | 3.9                                | 4.14         | 0.02                                                            | 6.04                              | 21.03        | 55.9                               |              |     |            |
| 150             | 5.7        | 10.69          | -0.63                 | 14.1                  | 3.8                                | 4.09         | 0.02                                                            | 5.74                              | 21.11        | 56.1                               |              |     |            |
| 175             | 5.74       | 10.71          | -0.46                 | 10.3                  | 3.7                                | 4            | 0.02                                                            | 4.8                               | 21.66        | 55.3                               |              |     |            |
| 200             | 5.76       | 10.72          | -0.38                 | 8.5                   | 3.7                                | 3.95         | 0.02                                                            | 4.44                              | 20.12        | 55.3                               |              |     |            |
| 250             | 5.68       | 10.75          | -1.05                 | 23.5                  | 4                                  | 4.32         | 0.02                                                            | 7.67                              | 23.3         | 57.7                               |              |     |            |
| 300             | 5.7        | 10.81          | -1.28                 | 28.6                  | 4.1                                | 4.35         | 0.02                                                            | 8.31                              | 24.31        | 58                                 |              |     |            |
| 400             | 5.72       | 10.86          | -1.33                 | 29.8                  | 4.1                                |              | 0.02                                                            | 8.7                               |              | 58.6                               |              | 7.1 | 3.2        |
| 440             | 5.73       | 10.86          | -1.35                 | 30.3                  | 4.1                                | 4.39         | 0.02                                                            | 9.06                              | 24.27        | 58.7                               |              |     |            |
| Sediment (466m) | 6.3        | 11.14          |                       |                       | 45                                 |              | 3.09                                                            | 416                               |              | 262                                |              | 7.5 | 43         |
