# Supplementary material for: A Metagenomics Transect into the Deepest Point of the Baltic Sea Reveals Clear Stratification of Microbial Functional Capacities
Source: PubMed Central journal article supplement (PMC3781128; doi:10.1371/journal.pone.0074983), 2013-09-23
Supplement: pone.0074983.s008.pdf [file pone.0074983.s008.pdf]

| <i>Sample</i> | <i>No. of total reads</i> | <i>No. of total reads after CD-HIT</i> | <i>Ave. read length (bp)</i> | <i>No. of reads assigned to taxa</i> | <i>% of total reads assigned to taxa</i> | <i>No. of reads assigned to SEED subsystems</i> | <i>% of total reads assigned to SEED subsystems</i> |
|---------------|---------------------------|----------------------------------------|------------------------------|--------------------------------------|------------------------------------------|-------------------------------------------------|-----------------------------------------------------|
| 10 m          | 185 809                   | 157 710                                | 334                          | 61 437                               | 39.0                                     | 27 291                                          | 17.3                                                |
| 75 m          | 354 912                   | 326 263                                | 344                          | 165 044                              | 50.6                                     | 74 284                                          | 22.8                                                |
| 400 m         | 434 236                   | 407 720                                | 352                          | 209 545                              | 51.4                                     | 94 614                                          | 23.2                                                |
| Sediment      | 340 083                   | 313 937                                | 347                          | 133 250                              | 42.4                                     | 63 917                                          | 20.4                                                |
| <b>Total</b>  | <b>1 315 040</b>          | <b>1 205 630</b>                       | <b>344</b>                   | <b>569 276</b>                       | <b>47.2</b>                              | <b>260 106</b>                                  | <b>21.6</b>                                         |
