# Supplementary material for: A Metagenomics Transect into the Deepest Point of the Baltic Sea Reveals Clear Stratification of Microbial Functional Capacities
Source: PubMed Central journal article supplement (PMC3781128; doi:10.1371/journal.pone.0074983), 2013-09-23
Supplement: pone.0074983.s009.pdf [file pone.0074983.s009.pdf]

|                   | <b>10 m</b> | <b>75 m</b> | <b>400 m</b> | <b>Sediment 1</b> | <b>Sediment 2</b> | <b>Sediment 3</b> |
|-------------------|-------------|-------------|--------------|-------------------|-------------------|-------------------|
| <b>10 m</b>       | 0.000       | 0.493       | 0.830        | 0.832             | 0.837             | 0.824             |
| <b>75 m</b>       | 0.493       | 0.000       | 0.552        | 0.613             | 0.622             | 0.611             |
| <b>400 m</b>      | 0.830       | 0.552       | 0.000        | 0.431             | 0.459             | 0.422             |
| <b>Sediment 1</b> | 0.832       | 0.613       | 0.431        | 0.000             | 0.067             | 0.109             |
| <b>Sediment 2</b> | 0.837       | 0.622       | 0.459        | 0.067             | 0.000             | 0.135             |
| <b>Sediment 3</b> | 0.824       | 0.611       | 0.422        | 0.109             | 0.135             | 0.000             |
