# Supplementary material for: A Metagenomics Transect into the Deepest Point of the Baltic Sea Reveals Clear Stratification of Microbial Functional Capacities
Source: PubMed Central journal article supplement (PMC3781128; doi:10.1371/journal.pone.0074983), 2013-09-23
Supplement: pone.0074983.s010.pdf [file pone.0074983.s010.pdf]

|          | $\text{NH}_4^+$ | $\text{PO}_4^{3-}$ | $\text{NO}_3^- + \text{NO}_2^-$ | $\text{SiO}_4$ | DOC   | Temperature | Salinity | $\text{O}_2$ |
|----------|-----------------|--------------------|---------------------------------|----------------|-------|-------------|----------|--------------|
| CA1-SEED | 0.69            | 0.73               | 0.59                            | 0.79           | 0.67  | 0.98        | 0.98     | -0.96        |
| CA2-SEED | 0.66            | 0.63               | 0.79                            | 0.56           | 0.68  | 0.04        | -0.10    | 0.06         |
| CA3-SEED | -0.23           | -0.20              | 0.11                            | -0.16          | -0.24 | 0.17        | 0.19     | -0.29        |
| CA1-Taxa | 0.60            | 0.64               | 0.52                            | 0.72           | 0.57  | 0.99        | 1.00     | -0.97        |
| CA2-Taxa | 0.79            | 0.75               | 0.76                            | 0.68           | 0.80  | 0.10        | -0.04    | 0.13         |
| CA3-Taxa | 0.04            | 0.05               | 0.39                            | 0.06           | 0.04  | 0.15        | 0.11     | -0.23        |
