# Supplementary material for: A Metagenomics Transect into the Deepest Point of the Baltic Sea Reveals Clear Stratification of Microbial Functional Capacities
Source: PubMed Central journal article supplement (PMC3781128; doi:10.1371/journal.pone.0074983), 2013-09-23
Supplement: pone.0074983.s011.pdf [file pone.0074983.s011.pdf]

| Taxonomical families                           | Species score |        |        | Abundance (normalised to 100 000 reads per dataset) |      |      |          |
|------------------------------------------------|---------------|--------|--------|-----------------------------------------------------|------|------|----------|
|                                                | CA1           | CA2    | CA3    | 10m                                                 | 75m  | 400m | Sediment |
| unclassified Flavobacteria                     | -1.207        | 0.221  | -0.600 | 2096                                                | 327  | 52   | 29       |
| OMG group                                      | -1.129        | 0.211  | -0.444 | 4574                                                | 1106 | 72   | 173      |
| unclassified Methylophilales                   | -1.107        | 0.133  | -0.289 | 783                                                 | 278  | 16   | 9        |
| environmental samples 2                        | -1.069        | 0.148  | -0.488 | 560                                                 | 125  | 39   | 17       |
| environmental samples 18                       | -1.064        | 0.074  | -0.046 | 18                                                  | 10   | 0    | 0        |
| Comamonadaceae                                 | -0.962        | 0.209  | -0.521 | 934                                                 | 174  | 78   | 92       |
| Flavobacteriaceae                              | -0.921        | 0.090  | -0.280 | 7756                                                | 2901 | 782  | 504      |
| SAR11 cluster                                  | -0.903        | -0.050 | 0.348  | 7219                                                | 7684 | 53   | 13       |
| unclassified Rhodobacterales                   | -0.894        | 0.086  | -0.123 | 162                                                 | 82   | 12   | 13       |
| environmental samples 21                       | -0.894        | -0.059 | 0.397  | 14                                                  | 16   | 0    | 0        |
| Rhodobacteraceae                               | -0.883        | 0.124  | -0.199 | 3985                                                | 1723 | 309  | 412      |
| environmental samples 20                       | -0.861        | 0.025  | 0.114  | 72                                                  | 55   | 4    | 5        |
| environmental samples 12                       | -0.841        | -0.098 | 0.236  | 28                                                  | 27   | 3    | 0        |
| Puniceococcaceae                               | -0.768        | 0.084  | -0.164 | 773                                                 | 373  | 107  | 110      |
| Anaplasmataceae                                | -0.758        | -0.153 | -0.558 | 14                                                  | 3    | 5    | 0        |
| environmental samples 1                        | -0.737        | -0.063 | -0.307 | 201                                                 | 79   | 55   | 13       |
| unclassified Flavobacteriales                  | -0.712        | 0.092  | -0.277 | 1366                                                | 522  | 255  | 232      |
| unclassified Alphaproteobacteria               | -0.601        | -0.148 | 0.237  | 356                                                 | 401  | 106  | 41       |
| Microbacteriaceae                              | -0.580        | 0.032  | 0.290  | 65                                                  | 74   | 9    | 19       |
| Rickettsiaceae                                 | -0.514        | 0.023  | 0.391  | 117                                                 | 164  | 18   | 44       |
| Sphingomonadaceae                              | -0.492        | -0.146 | 0.234  | 219                                                 | 264  | 86   | 46       |
| unclassified Actinobacteria                    | -0.484        | 0.105  | 0.270  | 96                                                  | 109  | 14   | 43       |
| Sanguibacteraceae                              | -0.462        | 0.305  | -0.366 | 20                                                  | 5    | 4    | 9        |
| environmental samples 3                        | -0.456        | -0.396 | 0.969  | 24                                                  | 122  | 16   | 0        |
| Dermabacteraceae                               | -0.443        | -0.412 | 1.570  | 0                                                   | 22   | 0    | 0        |
| Jonesiaceae                                    | -0.443        | -0.412 | 1.570  | 0                                                   | 5    | 0    | 0        |
| Leuconostocaceae                               | -0.443        | -0.412 | 1.570  | 0                                                   | 3    | 0    | 0        |
| environmental samples 13                       | -0.443        | -0.412 | 1.570  | 0                                                   | 170  | 0    | 0        |
| environmental samples 14                       | -0.443        | -0.412 | 1.570  | 0                                                   | 4    | 0    | 0        |
| unclassified Burkholderiales miscellaneous     | -0.443        | -0.412 | 1.570  | 0                                                   | 4    | 0    | 0        |
| environmental samples 19                       | -0.443        | -0.412 | 1.570  | 0                                                   | 7    | 0    | 0        |
| Halothiobacillaceae                            | -0.443        | -0.412 | 1.570  | 0                                                   | 4    | 0    | 0        |
| SAR86 cluster                                  | -0.443        | -0.412 | 1.570  | 0                                                   | 12   | 0    | 0        |
| Flammeovirgaceae                               | -0.430        | 0.082  | -0.736 | 14                                                  | 0    | 6    | 4        |
| Enterococcaceae                                | -0.402        | 0.112  | -0.267 | 20                                                  | 8    | 7    | 8        |
| Pseudomonadaceae                               | -0.392        | -0.303 | 1.022  | 212                                                 | 1327 | 126  | 86       |
| Acidimicrobiaceae                              | -0.384        | 0.082  | -0.046 | 247                                                 | 170  | 84   | 111      |
| Acidothermaceae                                | -0.383        | 0.143  | -0.162 | 41                                                  | 21   | 13   | 19       |
| Pseudoalteromonadaceae                         | -0.356        | -0.111 | 0.325  | 33                                                  | 51   | 16   | 14       |
| Cellulomonadaceae                              | -0.349        | -0.028 | -0.225 | 14                                                  | 7    | 7    | 5        |
| Aurantimonadaceae                              | -0.347        | -0.026 | 0.103  | 18                                                  | 18   | 8    | 8        |
| Cyclobacteriaceae                              | -0.342        | 0.165  | -0.305 | 264                                                 | 91   | 95   | 127      |
| unclassified Gammaproteobacteria miscellaneous | -0.294        | -0.020 | 0.085  | 88                                                  | 88   | 44   | 45       |
| Alteromonadales genera incertae sedis          | -0.280        | 0.026  | 0.174  | 18                                                  | 21   | 8    | 11       |
| Xanthobacteraceae                              | -0.260        | 0.115  | 0.147  | 59                                                  | 63   | 22   | 42       |
| Burkholderiales Genera incertae sedis          | -0.256        | 0.079  | -0.049 | 37                                                  | 27   | 17   | 22       |
| Sphingobacteriaceae                            | -0.254        | -0.069 | -0.263 | 442                                                 | 212  | 281  | 181      |
| Alcaligenaceae                                 | -0.244        | -0.108 | 0.580  | 47                                                  | 133  | 29   | 38       |
| Oxalobacteraceae                               | -0.244        | -0.154 | 0.331  | 25                                                  | 45   | 18   | 14       |
| Brucellaceae                                   | -0.230        | -0.055 | 0.175  | 18                                                  | 23   | 11   | 11       |
| Alteromonadaceae                               | -0.221        | -0.125 | 0.112  | 101                                                 | 120  | 73   | 53       |
| Verrucomicrobiaceae                            | -0.217        | 0.188  | -0.049 | 358                                                 | 248  | 139  | 264      |
| Brevibacteriaceae                              | -0.202        | 0.069  | 0.117  | 12                                                  | 13   | 6    | 9        |
| Hyphomonadaceae                                | -0.202        | 0.135  | 0.334  | 45                                                  | 72   | 16   | 44       |
| Caulobacteraceae                               | -0.201        | -0.315 | 0.328  | 82                                                  | 171  | 90   | 35       |
| Intrasporangiaceae                             | -0.182        | 0.258  | -0.100 | 22                                                  | 13   | 8    | 18       |
| Burkholderiaceae                               | -0.161        | -0.020 | 0.143  | 211                                                 | 264  | 142  | 159      |
| Propionibacteriaceae                           | -0.160        | 0.154  | -0.139 | 12                                                  | 7    | 6    | 9        |
| environmental samples 7                        | -0.150        | -0.144 | 0.257  | 326                                                 | 565  | 291  | 234      |
| Pasteurellaceae                                | -0.139        | -0.152 | 0.053  | 20                                                  | 23   | 18   | 12       |
| Actinosynnemataceae                            | -0.135        | 0.267  | -0.100 | 10                                                  | 6    | 4    | 9        |
| Micrococcaceae                                 | -0.122        | 0.187  | 0.048  | 51                                                  | 47   | 24   | 49       |
| Acetobacteraceae                               | -0.121        | -0.058 | 0.382  | 38                                                  | 84   | 31   | 39       |
| Chitinophagaceae                               | -0.111        | -0.062 | -0.262 | 108                                                 | 54   | 87   | 63       |
| environmental samples 23                       | -0.104        | -0.286 | 1.073  | 10                                                  | 846  | 133  | 149      |
| Bradyrhizobiaceae                              | -0.101        | -0.115 | 0.514  | 122                                                 | 391  | 127  | 149      |
| Erythrobacteraceae                             | -0.099        | 0.360  | 0.052  | 31                                                  | 26   | 9    | 36       |
| Phyllobacteriaceae                             | -0.096        | -0.008 | 0.241  | 106                                                 | 174  | 82   | 106      |
| unclassified Betaproteobacteria                | -0.091        | -0.007 | -0.111 | 53                                                  | 39   | 41   | 39       |
| Glycomycetaceae                                | -0.081        | 0.239  | -0.066 | 29                                                  | 20   | 14   | 29       |
| Idiomarinaceae                                 | -0.076        | -0.682 | 0.925  | 0                                                   | 13   | 5    | 0        |
| unclassified Verrucomicrobiales                | -0.072        | -0.134 | 0.370  | 100                                                 | 246  | 112  | 107      |
| Pseudonocardaceae                              | -0.069        | 0.203  | 0.028  | 42                                                  | 38   | 22   | 45       |
| Nocardiopsaceae                                | -0.050        | 0.088  | -0.068 | 14                                                  | 11   | 10   | 13       |
| Methylobacteriaceae                            | -0.049        | -0.184 | 0.470  | 30                                                  | 102  | 43   | 38       |
| Rhizobiaceae                                   | -0.049        | 0.086  | 0.144  | 80                                                  | 105  | 57   | 90       |
| Nitrosomonadaceae                              | -0.047        | -0.032 | 0.310  | 38                                                  | 79   | 36   | 46       |
| Methylophilaceae                               | -0.031        | -0.227 | -0.003 | 16                                                  | 19   | 20   | 11       |
| Frankiaceae                                    | -0.029        | 0.321  | 0.076  | 146                                                 | 141  | 60   | 193      |
| Chroococcales                                  | -0.023        | 0.296  | -0.123 | 771                                                 | 447  | 384  | 862      |
| Bifidobacteriaceae                             | -0.017        | 0.071  | -0.235 | 14                                                  | 7    | 11   | 12       |

|                                    |        |        |        |     |      |      |      |
|------------------------------------|--------|--------|--------|-----|------|------|------|
| Oceanospirillaceae                 | -0.016 | -0.257 | 0.162  | 28  | 51   | 41   | 23   |
| Prochlorococcaceae                 | -0.012 | 0.084  | -0.187 | 45  | 26   | 35   | 41   |
| Colwelliaceae                      | -0.003 | -0.309 | 0.387  | 10  | 34   | 20   | 11   |
| Cytophagaceae                      | -0.003 | -0.152 | -0.209 | 546 | 364  | 609  | 378  |
| Catenulisporaceae                  | 0.000  | 0.355  | -0.056 | 25  | 17   | 11   | 32   |
| Streptomycetaceae                  | 0.004  | 0.231  | -0.037 | 229 | 182  | 138  | 276  |
| Nitrospinaceae                     | 0.012  | -0.747 | 0.769  | 0   | 19   | 10   | 0    |
| Neisseriaceae                      | 0.016  | -0.015 | 0.005  | 24  | 26   | 24   | 25   |
| Nocardioidaceae                    | 0.016  | 0.339  | 0.001  | 124 | 101  | 58   | 170  |
| Thermomonosporaceae                | 0.021  | 0.214  | 0.067  | 14  | 15   | 9    | 19   |
| Rhodospirillaceae                  | 0.039  | -0.434 | 0.434  | 76  | 378  | 242  | 90   |
| Rhodocyclaceae                     | 0.044  | -0.229 | 0.098  | 30  | 50   | 47   | 29   |
| Shewanellaceae                     | 0.052  | -0.141 | 0.037  | 63  | 85   | 85   | 65   |
| environmental samples 11           | 0.052  | 0.200  | 0.315  | 14  | 29   | 10   | 27   |
| Reinekea                           | 0.052  | -0.777 | 0.699  | 0   | 10   | 6    | 0    |
| unclassified Euryarchaeota         | 0.054  | -0.381 | 0.840  | 0   | 338  | 117  | 73   |
| Geodermatophilaceae                | 0.062  | 0.424  | 0.264  | 16  | 25   | 5    | 33   |
| Enterobacteriaceae                 | 0.072  | -0.230 | 0.093  | 76  | 131  | 128  | 80   |
| Nostocaceae                        | 0.074  | 0.450  | -0.191 | 179 | 73   | 80   | 249  |
| environmental samples 25           | 0.075  | -0.725 | 0.487  | 14  | 160  | 121  | 7    |
| Micromonosporaceae                 | 0.080  | 0.450  | 0.099  | 38  | 39   | 14   | 69   |
| Kineosporiaceae                    | 0.089  | 0.458  | 0.009  | 10  | 8    | 4    | 17   |
| Moraxellaceae                      | 0.092  | -0.079 | -0.061 | 28  | 29   | 36   | 31   |
| Gemmatimonadaceae                  | 0.102  | 0.028  | 0.608  | 33  | 224  | 63   | 132  |
| Clostridiales Family XVIII Incerta | 0.129  | -0.199 | 0.794  | 0   | 51   | 16   | 19   |
| Rhodothermaceae                    | 0.151  | -0.421 | 0.399  | 90  | 610  | 449  | 200  |
| Methylococcaceae                   | 0.163  | -0.496 | 0.411  | 22  | 192  | 148  | 52   |
| Actinomycetaceae                   | 0.167  | 0.156  | 0.084  | 10  | 14   | 11   | 19   |
| Nakamurellaceae                    | 0.172  | 0.455  | 0.069  | 27  | 28   | 14   | 58   |
| Alcanivoraceae                     | 0.203  | 0.066  | 0.061  | 16  | 24   | 23   | 31   |
| Cenarchaeaceae                     | 0.204  | -0.889 | 0.431  | 0   | 53   | 51   | 0    |
| unclassified Oceanospirillales     | 0.213  | -0.896 | 0.416  | 0   | 254  | 251  | 0    |
| Xanthomonadaceae                   | 0.214  | 0.361  | 0.102  | 38  | 50   | 30   | 91   |
| environmental samples 8            | 0.217  | -0.898 | 0.409  | 0   | 3    | 3    | 0    |
| Ferrimonadaceae                    | 0.217  | -0.898 | 0.409  | 0   | 3    | 3    | 0    |
| Opiritaceae                        | 0.224  | -0.115 | 0.295  | 84  | 337  | 244  | 250  |
| Prevotellaceae                     | 0.234  | -0.297 | -0.306 | 49  | 32   | 99   | 48   |
| Nitrosopumilaceae                  | 0.237  | -0.891 | 0.269  | 254 | 4219 | 5050 | 72   |
| Streptosporangiaceae               | 0.239  | 0.423  | 0.055  | 18  | 20   | 13   | 44   |
| Corynebacteriaceae                 | 0.249  | 0.341  | 0.072  | 14  | 18   | 13   | 35   |
| Gallionellaceae                    | 0.255  | -0.147 | 0.055  | 12  | 24   | 29   | 24   |
| Beijerinckiaceae                   | 0.259  | -0.174 | 0.611  | 0   | 19   | 9    | 10   |
| Carnobacteriaceae                  | 0.266  | -0.038 | 0.648  | 0   | 8    | 3    | 5    |
| Spartobacteria                     | 0.273  | 0.187  | 0.110  | 147 | 259  | 215  | 398  |
| Beutenbergiaceae                   | 0.274  | 0.224  | 0.050  | 10  | 14   | 13   | 25   |
| Legionellaceae                     | 0.279  | 0.189  | -0.003 | 62  | 76   | 85   | 144  |
| Lentisphaeraceae                   | 0.289  | -0.180 | -0.026 | 96  | 163  | 247  | 184  |
| Psychromonadaceae                  | 0.295  | -0.100 | 0.117  | 10  | 26   | 28   | 27   |
| Leptospiraceae                     | 0.296  | 0.085  | -0.113 | 40  | 38   | 64   | 80   |
| sulfur oxidizing symbionts         | 0.303  | -0.858 | 0.295  | 0   | 194  | 232  | 16   |
| Thermaceae                         | 0.304  | 0.009  | -0.102 | 22  | 24   | 41   | 44   |
| Methylocystaceae                   | 0.310  | -0.311 | 0.484  | 0   | 16   | 11   | 8    |
| Hyphomicrobiaceae                  | 0.317  | 0.442  | 0.178  | 14  | 26   | 13   | 51   |
| Brachyspiraceae                    | 0.320  | -0.170 | -0.184 | 12  | 12   | 28   | 20   |
| Hahellaceae                        | 0.321  | -0.182 | 0.050  | 10  | 24   | 32   | 25   |
| Ectothiorhodospiraceae             | 0.321  | -0.089 | 0.203  | 18  | 70   | 65   | 68   |
| Acidobacteriaceae                  | 0.325  | 0.029  | 0.034  | 25  | 45   | 55   | 67   |
| Lactobacillaceae                   | 0.337  | 0.136  | -0.099 | 12  | 12   | 20   | 28   |
| Chromatiaceae                      | 0.338  | 0.031  | 0.189  | 28  | 93   | 82   | 111  |
| Nocardiaceae                       | 0.343  | 0.595  | 0.121  | 47  | 64   | 28   | 170  |
| Porphyromonadaceae                 | 0.343  | -0.207 | -0.272 | 28  | 21   | 67   | 43   |
| Oscillatoriales                    | 0.346  | -0.017 | -0.177 | 64  | 57   | 130  | 128  |
| Staphylococcaceae                  | 0.349  | -0.312 | 0.425  | 0   | 9    | 7    | 5    |
| unclassified Bacteroidetes         | 0.355  | -0.019 | -0.287 | 22  | 12   | 42   | 39   |
| Solibacteraceae                    | 0.358  | -0.096 | 0.306  | 27  | 220  | 177  | 195  |
| Bacteroidaceae                     | 0.361  | -0.123 | -0.321 | 226 | 121  | 487  | 365  |
| Bacillaceae                        | 0.365  | -0.157 | 0.115  | 67  | 234  | 282  | 244  |
| Francisellaceae                    | 0.368  | -0.421 | 0.358  | 0   | 16   | 15   | 8    |
| Dermacoccaceae                     | 0.370  | 0.568  | 0.714  | 0   | 9    | 0    | 11   |
| Thermoplasmataceae                 | 0.380  | -0.174 | 0.429  | 0   | 7    | 5    | 5    |
| Vibrionaceae                       | 0.382  | -0.254 | -0.083 | 39  | 72   | 141  | 91   |
| Planctomycetaceae                  | 0.388  | 0.368  | 0.463  | 447 | 4586 | 1417 | 6062 |
| Promicromonosporaceae              | 0.396  | 0.157  | 0.526  | 0   | 12   | 5    | 12   |
| environmental samples 16           | 0.418  | -0.389 | 0.294  | 0   | 18   | 19   | 11   |
| Bdellovibrionaceae                 | 0.421  | -0.098 | -0.041 | 10  | 20   | 35   | 32   |
| Bacteriovoraceae                   | 0.425  | -0.215 | 0.004  | 12  | 35   | 58   | 43   |
| Verrucomicrobia subdivision 3      | 0.433  | -0.033 | 0.142  | 51  | 226  | 257  | 295  |
| Methanopyraceae                    | 0.437  | -1.061 | 0.022  | 0   | 3    | 6    | 0    |
| environmental samples 15           | 0.457  | -1.075 | -0.014 | 0   | 7    | 15   | 0    |
| Rikenellaceae                      | 0.468  | -0.275 | -0.362 | 10  | 6    | 33   | 19   |
| Tsukamurellaceae                   | 0.480  | 0.701  | 0.598  | 0   | 3    | 0    | 5    |
| Fusobacteriaceae                   | 0.495  | -0.217 | -0.198 | 20  | 28   | 85   | 59   |
| Nannocystaceae                     | 0.496  | -0.111 | 0.038  | 16  | 65   | 103  | 97   |

|                                                           |       |        |        |    |     |     |     |
|-----------------------------------------------------------|-------|--------|--------|----|-----|-----|-----|
| Bartonellaceae                                            | 0.497 | 0.722  | 0.580  | 0  | 4   | 0   | 7   |
| Thermomicrobiaceae                                        | 0.502 | -0.183 | 0.244  | 0  | 20  | 22  | 20  |
| Thiotrichaceae                                            | 0.512 | -0.238 | -0.113 | 24 | 57  | 138 | 96  |
| Acidithiobacillaceae                                      | 0.523 | -0.426 | 0.124  | 0  | 11  | 17  | 9   |
| Halobacteriaceae                                          | 0.524 | -0.028 | 0.071  | 10 | 50  | 73  | 82  |
| Sphaerobacteraceae                                        | 0.526 | 0.161  | 0.333  | 0  | 62  | 45  | 87  |
| Nitrospiraceae                                            | 0.527 | -0.048 | -0.002 | 20 | 67  | 118 | 123 |
| Mariprofundaceae                                          | 0.529 | -0.474 | 0.098  | 0  | 23  | 38  | 18  |
| Moritellaceae                                             | 0.531 | -0.277 | 0.166  | 0  | 11  | 15  | 11  |
| Rubrobacteraceae                                          | 0.534 | 0.434  | 0.076  | 12 | 27  | 28  | 80  |
| Haliangiaceae                                             | 0.537 | 0.036  | -0.002 | 25 | 75  | 129 | 157 |
| Lachnospiraceae                                           | 0.538 | -0.059 | -0.273 | 18 | 14  | 62  | 56  |
| environmental samples 5                                   | 0.544 | 0.078  | 0.276  | 0  | 20  | 18  | 28  |
| Streptococcaceae                                          | 0.544 | 0.052  | 0.267  | 0  | 16  | 15  | 22  |
| Helicobacteraceae                                         | 0.558 | -1.045 | -0.296 | 32 | 177 | 701 | 34  |
| unclassified Campylobacterales (Sulfurimonas gottlandica) | 0.560 | -1.082 | -0.232 | 18 | 265 | 906 | 29  |
| Campylobacteraceae                                        | 0.564 | -0.793 | -0.204 | 10 | 63  | 206 | 40  |
| Herpetosiphonaceae                                        | 0.567 | 0.379  | -0.039 | 22 | 33  | 56  | 127 |
| Pelobacteraceae                                           | 0.570 | 0.098  | 0.011  | 14 | 48  | 81  | 111 |
| Piscirickettsiaceae                                       | 0.571 | -0.453 | 0.042  | 0  | 18  | 34  | 17  |
| Ktedonobacteraceae                                        | 0.583 | 0.176  | 0.078  | 16 | 80  | 110 | 181 |
| Polyangiaceae                                             | 0.584 | 0.099  | 0.029  | 16 | 68  | 111 | 154 |
| Paenibacillaceae                                          | 0.594 | -0.062 | -0.122 | 16 | 37  | 99  | 96  |
| Methanothermaceae                                         | 0.594 | -1.176 | -0.255 | 0  | 3   | 11  | 0   |
| Alicyclobacillaceae                                       | 0.594 | -0.053 | 0.153  | 0  | 18  | 24  | 27  |
| Ferroplasmaceae                                           | 0.599 | -0.224 | 0.084  | 0  | 3   | 5   | 4   |
| Trueperaceae                                              | 0.604 | 0.252  | 0.250  | 0  | 16  | 14  | 30  |
| Chlorobiaceae                                             | 0.605 | -0.348 | -0.273 | 98 | 160 | 715 | 398 |
| Parachlamydiaceae                                         | 0.607 | 0.408  | -0.117 | 12 | 12  | 30  | 67  |
| Methanosacetaceae                                         | 0.611 | 0.331  | 0.268  | 0  | 9   | 7   | 18  |
| Cystobacteraceae                                          | 0.614 | -0.087 | 0.111  | 0  | 35  | 53  | 55  |
| Ruminococcaceae                                           | 0.624 | 0.038  | -0.217 | 30 | 34  | 138 | 152 |
| unclassified Acidobacteria                                | 0.625 | -0.238 | -0.119 | 10 | 44  | 123 | 89  |
| Desulfovibrionaceae                                       | 0.634 | -0.124 | -0.171 | 41 | 95  | 317 | 273 |
| unclassified Proteobacteria                               | 0.639 | -0.193 | 0.035  | 0  | 32  | 61  | 51  |
| Aeromonadaceae                                            | 0.652 | -0.096 | 0.052  | 0  | 5   | 9   | 9   |
| Methylacidiphilaceae                                      | 0.653 | -0.004 | 0.084  | 0  | 13  | 21  | 25  |
| Myxococcaceae                                             | 0.657 | 0.001  | -0.048 | 12 | 66  | 151 | 170 |
| Sulfobaceae                                               | 0.660 | -0.364 | -0.058 | 0  | 6   | 15  | 9   |
| Synergistaceae                                            | 0.661 | 0.124  | -0.118 | 10 | 22  | 63  | 84  |
| unclassified Bacteria                                     | 0.661 | -0.162 | -0.127 | 51 | 229 | 682 | 565 |
| Chloroflexaceae                                           | 0.673 | 0.306  | -0.049 | 38 | 97  | 211 | 400 |
| Hydrogenophilaceae                                        | 0.676 | -0.089 | 0.019  | 0  | 5   | 10  | 10  |
| unclassified Cyanobacteria                                | 0.678 | 0.093  | 0.082  | 0  | 20  | 32  | 45  |
| Helioacteriaceae                                          | 0.699 | -0.123 | -0.028 | 0  | 6   | 14  | 13  |
| environmental samples 4                                   | 0.709 | -0.079 | -0.027 | 0  | 3   | 7   | 7   |
| Dehalococcoidetes                                         | 0.711 | -0.674 | -0.376 | 18 | 57  | 392 | 120 |
| Nautiliaceae                                              | 0.711 | -0.853 | -0.311 | 0  | 5   | 25  | 5   |
| unclassified Planctomycetales                             | 0.718 | -0.161 | -0.147 | 12 | 90  | 308 | 257 |
| Desulfurococcaceae                                        | 0.723 | -0.075 | -0.046 | 0  | 6   | 15  | 15  |
| Clostridiaceae                                            | 0.724 | 0.052  | -0.224 | 61 | 93  | 474 | 536 |
| Veillonellaceae                                           | 0.726 | -0.143 | -0.075 | 0  | 16  | 44  | 39  |
| Halomonadaceae                                            | 0.729 | -0.128 | -0.074 | 0  | 4   | 11  | 10  |
| Geobacteraceae                                            | 0.740 | -0.040 | -0.167 | 26 | 114 | 440 | 443 |
| Aquificaceae                                              | 0.748 | -0.397 | -0.201 | 0  | 10  | 41  | 23  |
| Coriobacteriaceae                                         | 0.755 | 0.092  | -0.034 | 0  | 9   | 22  | 29  |
| Coxiellaceae                                              | 0.772 | 0.127  | -0.047 | 0  | 10  | 26  | 36  |
| Gloeobacteria                                             | 0.775 | 0.070  | -0.071 | 0  | 7   | 20  | 25  |
| Thermoproteaceae                                          | 0.776 | -0.060 | -0.121 | 0  | 5   | 17  | 17  |
| Methanosarcinaceae                                        | 0.777 | 0.204  | -0.153 | 18 | 52  | 214 | 317 |
| Deinococcaceae                                            | 0.778 | 0.328  | 0.017  | 0  | 9   | 18  | 36  |
| Korarchaeota                                              | 0.779 | -0.319 | -0.219 | 0  | 3   | 14  | 9   |
| Fibrobacteraceae                                          | 0.781 | -0.344 | -0.232 | 0  | 8   | 39  | 24  |
| Syntrophaceae                                             | 0.783 | 0.023  | -0.212 | 10 | 31  | 163 | 178 |
| Desulfobulbaceae                                          | 0.784 | -0.329 | -0.379 | 14 | 20  | 226 | 136 |
| Methanococcaceae                                          | 0.784 | -0.287 | -0.215 | 0  | 12  | 56  | 38  |
| Desulfuromonadaceae                                       | 0.787 | -0.103 | -0.152 | 0  | 14  | 54  | 50  |
| Methanobacteriaceae                                       | 0.789 | 0.082  | -0.088 | 0  | 11  | 34  | 43  |
| Waddliaceae                                               | 0.792 | 0.384  | 0.017  | 0  | 5   | 10  | 22  |
| SAR406 cluster                                            | 0.793 | -1.143 | -0.539 | 0  | 8   | 97  | 7   |
| Peptococcaceae                                            | 0.799 | -0.128 | -0.180 | 0  | 45  | 196 | 173 |
| Spirochaetaceae                                           | 0.803 | -0.255 | -0.379 | 26 | 30  | 409 | 278 |
| Thermococcaceae                                           | 0.807 | -0.147 | -0.199 | 0  | 20  | 95  | 81  |
| Syntrophomonadaceae                                       | 0.811 | -0.088 | -0.183 | 0  | 18  | 82  | 77  |
| unclassified Epsilonproteobacteria                        | 0.813 | -0.076 | -0.181 | 0  | 31  | 141 | 135 |
| Oscillochloridaceae                                       | 0.814 | 0.248  | -0.065 | 0  | 14  | 41  | 68  |
| Hydrogenothermaceae                                       | 0.817 | -0.342 | -0.284 | 0  | 6   | 39  | 24  |
| environmental samples 24                                  | 0.821 | 0.155  | -0.110 | 0  | 7   | 25  | 35  |
| Dictyoglomaceae                                           | 0.823 | -0.032 | -0.180 | 0  | 9   | 42  | 43  |
| Halanaerobiaceae                                          | 0.826 | -0.329 | -0.293 | 0  | 10  | 70  | 44  |
| Thermoanaerobacteraceae                                   | 0.831 | -0.123 | -0.226 | 0  | 22  | 125 | 110 |
| Victivallaceae                                            | 0.832 | -0.345 | -0.307 | 0  | 54  | 407 | 249 |
| Deferribacteraceae                                        | 0.832 | -0.389 | -0.324 | 0  | 11  | 88  | 50  |

|                                                                |       |        |        |     |     |      |      |
|----------------------------------------------------------------|-------|--------|--------|-----|-----|------|------|
| Desulfohalobiaceae                                             | 0.841 | -0.116 | -0.238 | 0   | 27  | 167  | 148  |
| Methanomicrobiaceae                                            | 0.845 | -0.022 | -0.209 | 0   | 6   | 34   | 35   |
| Elusimicrobiaceae                                              | 0.845 | -0.341 | -0.325 | 0   | 3   | 26   | 16   |
| Desulfarculaceae                                               | 0.847 | -0.235 | -0.289 | 0   | 16  | 123  | 90   |
| Syntrophobacteraceae                                           | 0.847 | -0.044 | -0.319 | 10  | 16  | 206  | 197  |
| unclassified Methanomicrobiales                                | 0.850 | -0.009 | -0.212 | 0   | 7   | 41   | 43   |
| Eubacteriaceae                                                 | 0.856 | 0.083  | -0.188 | 0   | 6   | 33   | 40   |
| Archaeoglobaceae                                               | 0.858 | -0.353 | -0.349 | 0   | 8   | 83   | 50   |
| Methanospirillaceae                                            | 0.860 | -0.201 | -0.298 | 0   | 3   | 26   | 20   |
| unclassified Deltaproteobacteria (deltaproteobacterium NaphS2) | 0.866 | -0.675 | -0.507 | 53  | 193 | 5469 | 1848 |
| Desulfobacteraceae                                             | 0.869 | -0.037 | -0.327 | 126 | 217 | 3425 | 3306 |
| Thermotogaceae                                                 | 0.871 | 0.030  | -0.230 | 0   | 15  | 106  | 117  |
| Methanocellaceae                                               | 0.874 | -0.107 | -0.283 | 0   | 3   | 27   | 24   |
| Thermoanaerobacteriales Family III Incertae Sedis              | 0.875 | -0.031 | -0.257 | 0   | 7   | 57   | 57   |
| unclassified Bacteroidales                                     | 0.877 | -1.385 | -0.753 | 0   | 0   | 3    | 0    |
| environmental samples 6                                        | 0.877 | -1.385 | -0.753 | 0   | 0   | 6    | 0    |
| Peptostreptococcaceae                                          | 0.877 | -1.385 | -0.753 | 0   | 0   | 3    | 0    |
| environmental samples 9                                        | 0.877 | -1.385 | -0.753 | 0   | 0   | 8    | 0    |
| Thermodesulfobiaceae                                           | 0.877 | -1.385 | -0.753 | 0   | 0   | 4    | 0    |
| Acidaminococcaceae                                             | 0.877 | -1.385 | -0.753 | 0   | 0   | 6    | 0    |
| environmental samples 10                                       | 0.877 | -1.385 | -0.753 | 0   | 0   | 3    | 0    |
| environmental samples 17                                       | 0.877 | -1.385 | -0.753 | 0   | 0   | 4    | 0    |
| unclassified Alteromonadales                                   | 0.877 | -1.385 | -0.753 | 0   | 0   | 3    | 0    |
| unclassified Thiotrichales                                     | 0.877 | -1.385 | -0.753 | 0   | 0   | 4    | 0    |
| unclassified Thermotogales                                     | 0.884 | 0.061  | -0.238 | 0   | 5   | 40   | 46   |
| Erysipelotrichaceae                                            | 0.885 | 0.219  | -0.181 | 0   | 5   | 31   | 46   |
| Mycobacteriaceae                                               | 0.891 | 1.217  | 0.032  | 230 | 279 | 117  | 6315 |
| unclassified Clostridiales                                     | 0.901 | -0.186 | -0.352 | 0   | 3   | 50   | 39   |
| Nanoarchaeota                                                  | 0.902 | -0.950 | -0.632 | 0   | 0   | 32   | 6    |
| Desulfomicrobiaceae                                            | 0.906 | 0.206  | -0.218 | 0   | 4   | 35   | 50   |
| Conexibacteraceae                                              | 0.913 | 1.236  | 0.034  | 102 | 142 | 57   | 3558 |
| Thermofilaceae                                                 | 0.933 | -0.401 | -0.479 | 0   | 0   | 9    | 5    |
| environmental samples 22                                       | 0.940 | -0.283 | -0.446 | 0   | 0   | 6    | 4    |
| Methanocaldococcaceae                                          | 0.940 | -0.283 | -0.446 | 0   | 0   | 21   | 14   |
| Listeriaceae                                                   | 0.947 | -0.161 | -0.412 | 0   | 0   | 5    | 4    |
| Clostridiales Family XI Incertae Sedis                         | 0.947 | -0.161 | -0.412 | 0   | 0   | 15   | 12   |
| Bacillales Family XII Incertae Sedis                           | 0.948 | -0.133 | -0.404 | 0   | 0   | 6    | 5    |
| Halobacteroidaceae                                             | 0.953 | -0.055 | -0.383 | 0   | 0   | 30   | 28   |
| Mycoplasmataceae                                               | 0.956 | -0.008 | -0.369 | 0   | 0   | 5    | 5    |
| Natranaerobiaceae                                              | 0.963 | 0.125  | -0.332 | 0   | 0   | 14   | 17   |
| Parvularculaceae                                               | 0.964 | 0.145  | -0.327 | 0   | 0   | 4    | 5    |
| Aerococcaceae                                                  | 0.967 | 0.189  | -0.315 | 0   | 0   | 6    | 8    |
| Methanocorpusculaceae                                          | 0.967 | 0.189  | -0.315 | 0   | 0   | 6    | 8    |
| Cardiobacteriaceae                                             | 0.975 | 0.336  | -0.274 | 0   | 0   | 3    | 5    |
| Chlamydiaceae                                                  | 0.977 | 0.368  | -0.265 | 0   | 0   | 4    | 7    |
| Acholeplasmataceae                                             | 0.992 | 0.635  | -0.191 | 0   | 0   | 8    | 22   |
| Gordoniaceae                                                   | 1.034 | 1.369  | 0.014  | 0   | 0   | 0    | 24   |
| Segniliparaceae                                                | 1.034 | 1.369  | 0.014  | 0   | 0   | 0    | 6    |

| SEED Hierarchy 2                                                           | Species scores |        |        | Abundance (normalised to 100 000 reads per dataset) |      |      |          |
|----------------------------------------------------------------------------|----------------|--------|--------|-----------------------------------------------------|------|------|----------|
|                                                                            | CA1            | CA2    | CA3    | 10m                                                 | 75m  | 400m | Sediment |
| Agrobacterium opine transport                                              | -0.889         | 0.123  | -0.433 | 18                                                  | 5    | 2    | 1        |
| L 2 amino thiazoline 4 carboxylic acid Lcysteine conversion                | -0.857         | 0.067  | 0.582  | 2                                                   | 3    | 0    | 0        |
| Amidase clustered with urea and nitrile hydratase functions                | -0.724         | 0.326  | -0.133 | 4                                                   | 2    | 0    | 1        |
| DNA binding regulatory proteins strays                                     | -0.595         | 0.069  | -0.023 | 93                                                  | 62   | 21   | 19       |
| Alkylphosphonate utilization                                               | -0.580         | 0.100  | -0.205 | 76                                                  | 35   | 17   | 17       |
| p cymene degradation                                                       | -0.580         | -0.094 | 1.658  | 0                                                   | 4    | 0    | 0        |
| Cyanate hydrolysis                                                         | -0.552         | 0.014  | -0.090 | 10                                                  | 6    | 3    | 2        |
| Dimethylarginine metabolism                                                | -0.519         | 0.152  | -0.227 | 37                                                  | 16   | 8    | 11       |
| Biogenesis of cytochrome c oxidases                                        | -0.513         | -0.030 | -0.006 | 169                                                 | 122  | 61   | 35       |
| Phosphonate metabolism                                                     | -0.495         | 0.014  | -0.044 | 24                                                  | 16   | 8    | 6        |
| Aromatic Amin Catabolism                                                   | -0.479         | 0.141  | -0.085 | 47                                                  | 28   | 11   | 16       |
| Gentisare degradation                                                      | -0.461         | 0.074  | 0.110  | 82                                                  | 73   | 24   | 28       |
| Salicylate and gentisate catabolism                                        | -0.433         | 0.040  | 0.122  | 86                                                  | 80   | 30   | 30       |
| Pyrimidines                                                                | -0.428         | 0.037  | -0.120 | 120                                                 | 69   | 43   | 38       |
| YaaA                                                                       | -0.371         | -0.067 | -0.120 | 20                                                  | 12   | 10   | 6        |
| Plant Alkaloids                                                            | -0.343         | -0.294 | 0.150  | 35                                                  | 40   | 30   | 6        |
| Allantoin Utilization                                                      | -0.317         | 0.146  | 0.377  | 16                                                  | 25   | 5    | 11       |
| Iron Scavenging Mechanisms                                                 | -0.314         | 0.015  | -0.136 | 1472                                                | 841  | 683  | 606      |
| Ton and Tol transport systems                                              | -0.300         | -0.019 | -0.146 | 1554                                                | 877  | 792  | 624      |
| Social motility and nonflagellar swimming in bacteria                      | -0.298         | 0.323  | -0.031 | 6                                                   | 4    | 1    | 4        |
| Metabolism of central aromatic intermediates                               | -0.289         | 0.079  | 0.170  | 350                                                 | 383  | 151  | 203      |
| Lysine threonine methionine and cysteine                                   | -0.278         | 0.022  | 0.027  | 12                                                  | 10   | 6    | 6        |
| Benzoate transport and degradation cluster                                 | -0.257         | -0.011 | 0.152  | 110                                                 | 122  | 64   | 60       |
| Adenosyl nucleosidases                                                     | -0.254         | 0.153  | -0.154 | 51                                                  | 27   | 19   | 29       |
| Pyridoxine                                                                 | -0.238         | 0.015  | -0.007 | 143                                                 | 113  | 78   | 77       |
| Proline and 4 hydroxyproline                                               | -0.218         | 0.044  | 0.123  | 213                                                 | 224  | 117  | 137      |
| Histidine Metabolism                                                       | -0.218         | -0.011 | 0.034  | 483                                                 | 426  | 293  | 271      |
| Detoxification 1                                                           | -0.214         | -0.041 | 0.052  | 113                                                 | 105  | 74   | 62       |
| Alanine serine and glycine                                                 | -0.203         | -0.010 | -0.015 | 749                                                 | 596  | 460  | 424      |
| Transport of Manganese                                                     | -0.199         | 0.144  | -0.201 | 104                                                 | 49   | 44   | 64       |
| Organic acids                                                              | -0.198         | 0.019  | 0.017  | 374                                                 | 318  | 220  | 228      |
| YgjD and YeaZ                                                              | -0.190         | -0.033 | -0.064 | 113                                                 | 81   | 73   | 62       |
| Thioredoxin disulfide reductase                                            | -0.186         | 0.029  | 0.035  | 98                                                  | 87   | 58   | 63       |
| LMPTP YwIE cluster                                                         | -0.180         | -0.008 | -0.052 | 143                                                 | 105  | 90   | 84       |
| Biologically active compounds in metazoan cell defence and differentiation | -0.177         | 0.056  | 0.061  | 49                                                  | 46   | 28   | 34       |
| Secretion                                                                  | -0.175         | -0.065 | 0.076  | 75                                                  | 76   | 56   | 45       |
| Stringent Response p ppGpp metabolism                                      | -0.169         | 0.000  | -0.095 | 130                                                 | 86   | 81   | 77       |
| Choline Transport                                                          | -0.152         | 0.364  | -0.362 | 8                                                   | 2    | 2    | 6        |
| ATP synthases                                                              | -0.151         | -0.104 | -0.077 | 460                                                 | 332  | 360  | 250      |
| YcfH                                                                       | -0.148         | -0.157 | -0.115 | 51                                                  | 34   | 43   | 25       |
| Plant Hormones                                                             | -0.145         | -0.022 | 0.107  | 164                                                 | 179  | 121  | 116      |
| Clustering based subsystems 1                                              | -0.144         | 0.003  | -0.011 | 169                                                 | 139  | 113  | 113      |
| Biogenesis of c type cytochromes                                           | -0.134         | -0.005 | 0.061  | 259                                                 | 255  | 185  | 186      |
| UDP N acetylmuramate from Fructose 6 phosphate Biosynthesis                | -0.131         | -0.003 | 0.022  | 195                                                 | 175  | 137  | 137      |
| Isoprenoids                                                                | -0.123         | 0.043  | -0.006 | 654                                                 | 543  | 420  | 485      |
| carbazol degradation cluster                                               | -0.117         | 0.303  | 0.111  | 26                                                  | 26   | 8    | 27       |
| CO2 fixation                                                               | -0.116         | 0.084  | 0.107  | 652                                                 | 700  | 404  | 561      |
| Purines                                                                    | -0.115         | -0.020 | 0.004  | 1139                                                | 996  | 847  | 807      |
| Branched chain amino acids                                                 | -0.108         | 0.093  | -0.003 | 1180                                                | 978  | 701  | 956      |
| Carbon monoxide dehydrogenase maturation factors                           | -0.106         | 0.158  | 0.141  | 36                                                  | 41   | 19   | 35       |
| Thiamin biosynthesis                                                       | -0.102         | -0.024 | 0.068  | 227                                                 | 234  | 180  | 174      |
| Bacterial cytostatics differentiation factors and antibiotics              | -0.100         | 0.078  | 0.011  | 67                                                  | 58   | 42   | 55       |
| Heat shock dnaK gene cluster extended                                      | -0.097         | -0.041 | -0.047 | 653                                                 | 511  | 511  | 454      |
| Hydantoin metabolism                                                       | -0.096         | 0.000  | 0.139  | 122                                                 | 148  | 97   | 104      |
| De Novo Pyrimidine Synthesis                                               | -0.091         | 0.022  | 0.036  | 302                                                 | 285  | 220  | 244      |
| Quinone cofactors                                                          | -0.087         | 0.014  | 0.120  | 371                                                 | 431  | 289  | 323      |
| Staphylococcal phi Mu50B like prophages                                    | -0.087         | 0.000  | 0.129  | 67                                                  | 80   | 54   | 58       |
| Control of Macromolecuar Synthesis                                         | -0.084         | -0.022 | -0.002 | 509                                                 | 447  | 402  | 387      |
| NAD and NADP                                                               | -0.084         | 0.008  | 0.043  | 332                                                 | 322  | 253  | 271      |
| NusA TFII Cluster                                                          | -0.083         | -0.075 | 0.020  | 239                                                 | 226  | 211  | 174      |
| RNA processing and modification                                            | -0.080         | -0.028 | 0.010  | 1454                                                | 1320 | 1179 | 1118     |
| Lysine threonine methionine and cysteine 1                                 | -0.080         | 0.000  | 0.041  | 1739                                                | 1690 | 1356 | 1417     |
| Purine Utilization                                                         | -0.077         | -0.099 | 0.037  | 173                                                 | 173  | 163  | 126      |
| Coenzyme A                                                                 | -0.077         | 0.014  | 0.058  | 239                                                 | 241  | 184  | 202      |
| Central carbohydrate metabolism                                            | -0.075         | 0.004  | 0.006  | 2188                                                | 1952 | 1681 | 1760     |
| Uni Sym and Antiporters                                                    | -0.074         | 0.113  | -0.030 | 78                                                  | 61   | 47   | 68       |
| X urea cycle polyamines                                                    | -0.074         | 0.051  | 0.011  | 807                                                 | 716  | 565  | 686      |
| Osmotic stress                                                             | -0.072         | 0.184  | 0.073  | 291                                                 | 287  | 152  | 295      |
| Oxidative stress                                                           | -0.067         | 0.029  | 0.082  | 485                                                 | 520  | 374  | 436      |
| ammonia assimilation                                                       | -0.066         | 0.074  | 0.030  | 139                                                 | 129  | 95   | 125      |
| Fatty acids                                                                | -0.065         | 0.022  | 0.041  | 704                                                 | 684  | 541  | 609      |
| DNA structural proteins bacterial                                          | -0.065         | -0.169 | -0.055 | 44                                                  | 36   | 45   | 28       |
| Protein biosynthesis                                                       | -0.060         | -0.078 | -0.012 | 3096                                                | 2744 | 2821 | 2329     |
| DNA replication                                                            | -0.058         | -0.033 | -0.011 | 1991                                                | 1741 | 1683 | 1584     |
| Phospholipids                                                              | -0.056         | 0.038  | 0.019  | 548                                                 | 505  | 411  | 484      |
| Peptidoglycan Biosynthesis                                                 | -0.055         | 0.009  | -0.040 | 977                                                 | 782  | 756  | 800      |
| Ammonia assimilation                                                       | -0.053         | 0.024  | 0.098  | 563                                                 | 635  | 456  | 530      |
| Lipoic acid                                                                | -0.047         | 0.130  | -0.004 | 76                                                  | 64   | 47   | 73       |
| CBSS 562 2 peg 5158 SK3 including                                          | -0.046         | -0.037 | 0.201  | 2                                                   | 3    | 2    | 2        |
| Transport of Zinc                                                          | -0.044         | -0.109 | 0.086  | 103                                                 | 120  | 109  | 85       |
| Biotin                                                                     | -0.043         | -0.002 | 0.042  | 141                                                 | 141  | 119  | 126      |
| Sex pheromones in Enterococcus faecalis and other Firmicutes               | -0.042         | 0.084  | -0.154 | 118                                                 | 67   | 77   | 98       |
| Bacterial Cell Division                                                    | -0.042         | -0.015 | -0.023 | 1039                                                | 884  | 870  | 869      |
| Folate and pterines                                                        | -0.041         | -0.038 | -0.034 | 635                                                 | 529  | 552  | 515      |
| Detoxification                                                             | -0.035         | -0.008 | 0.055  | 24                                                  | 25   | 21   | 22       |

|                                                                        |        |        |        |      |      |      |      |
|------------------------------------------------------------------------|--------|--------|--------|------|------|------|------|
| proteosome related                                                     | -0.033 | 0.145  | -0.029 | 110  | 87   | 67   | 108  |
| DNA repair                                                             | -0.033 | -0.049 | -0.033 | 1903 | 1606 | 1715 | 1558 |
| Ribonucleotide reduction                                               | -0.027 | -0.119 | 0.106  | 205  | 256  | 232  | 179  |
| Hfl operon                                                             | -0.024 | -0.060 | 0.146  | 94   | 127  | 99   | 92   |
| Pathogenicity islands                                                  | -0.024 | 0.019  | -0.022 | 166  | 141  | 135  | 150  |
| Bacterial RNA metabolizing Zn dependent hydrolases                     | -0.018 | 0.012  | -0.035 | 398  | 329  | 330  | 358  |
| Glutathione regulated potassium efflux system and associated functions | -0.018 | -0.159 | -0.025 | 110  | 100  | 123  | 83   |
| Transcription                                                          | -0.017 | -0.052 | 0.006  | 1363 | 1291 | 1303 | 1196 |
| Protein folding                                                        | -0.016 | -0.058 | 0.004  | 690  | 652  | 667  | 603  |
| Peripheral pathways for catabolism of aromatic compounds               | -0.012 | 0.058  | 0.101  | 408  | 474  | 337  | 440  |
| Phosphate metabolism                                                   | -0.009 | 0.034  | -0.004 | 762  | 683  | 626  | 735  |
| ZZ gjo need homes                                                      | -0.005 | 0.060  | 0.019  | 494  | 466  | 393  | 502  |
| pH adaptation potassium efflux system                                  | -0.001 | 0.238  | -0.179 | 2    | 1    | 1    | 2    |
| Cell cycle in Prokaryota                                               | -0.001 | -0.026 | -0.018 | 1065 | 946  | 989  | 978  |
| Invasion and intracellular resistance                                  | 0.005  | -0.008 | 0.086  | 227  | 265  | 221  | 238  |
| Aromatic amino acids and derivatives                                   | 0.007  | 0.049  | 0.073  | 206  | 227  | 178  | 225  |
| Gram Negative cell wall components                                     | 0.013  | -0.016 | -0.019 | 714  | 635  | 668  | 684  |
| Tetrapyrroles                                                          | 0.017  | -0.025 | 0.022  | 718  | 720  | 708  | 716  |
| One carbon Metabolism                                                  | 0.028  | 0.024  | 0.051  | 714  | 764  | 669  | 787  |
| Potassium homeostasis                                                  | 0.028  | -0.010 | -0.016 | 254  | 230  | 243  | 255  |
| DNA recombination                                                      | 0.031  | -0.033 | -0.108 | 114  | 80   | 108  | 104  |
| Riboflavin FMN FAD                                                     | 0.032  | 0.074  | 0.035  | 129  | 130  | 109  | 147  |
| YjeE                                                                   | 0.035  | -0.189 | -0.043 | 87   | 79   | 111  | 72   |
| Protein degradation                                                    | 0.037  | 0.015  | 0.033  | 713  | 735  | 685  | 783  |
| Muconate lactonizing enzyme family                                     | 0.045  | 0.197  | 0.009  | 20   | 18   | 13   | 25   |
| Sulfur oxidation                                                       | 0.051  | -0.033 | -0.001 | 92   | 89   | 97   | 97   |
| Electron donating reactions                                            | 0.053  | -0.049 | 0.000  | 1251 | 1227 | 1367 | 1311 |
| LMPPTP YfkJ cluster                                                    | 0.073  | 0.061  | -0.010 | 26   | 24   | 24   | 31   |
| Organic sulfur assimilation                                            | 0.080  | 0.173  | 0.208  | 251  | 403  | 213  | 419  |
| Capsular and extracellular polysaccharides                             | 0.087  | 0.040  | -0.035 | 692  | 604  | 672  | 818  |
| Conserved gene cluster associated with Met tRNA formyltransferase      | 0.088  | 0.084  | -0.033 | 454  | 392  | 407  | 556  |
| High affinity phosphate transporter and control of PHO regulon         | 0.088  | 0.081  | -0.041 | 224  | 189  | 201  | 272  |
| Electron accepting reactions                                           | 0.101  | -0.052 | 0.037  | 499  | 569  | 626  | 616  |
| Polyhydroxybutyrate metabolism                                         | 0.102  | 0.159  | 0.059  | 80   | 88   | 67   | 117  |
| Detection                                                              | 0.106  | -0.061 | 0.039  | 45   | 52   | 58   | 56   |
| Resistance to antibiotics and toxic compounds                          | 0.107  | -0.027 | -0.004 | 1604 | 1607 | 1878 | 1954 |
| Aromatic amino acids and derivatives 1                                 | 0.110  | 0.203  | 0.143  | 16   | 22   | 13   | 27   |
| Formate hydrogenase                                                    | 0.113  | 0.000  | -0.004 | 168  | 167  | 190  | 212  |
| Protein processing and modification                                    | 0.113  | -0.006 | -0.046 | 332  | 292  | 368  | 400  |
| Flagellar motility in Prokaryota                                       | 0.120  | -0.025 | -0.024 | 738  | 704  | 873  | 913  |
| Monosaccharides                                                        | 0.133  | 0.090  | -0.106 | 1189 | 837  | 1107 | 1510 |
| Biosynthesis of phenylpropanoids                                       | 0.134  | 0.179  | -0.135 | 26   | 16   | 20   | 34   |
| Cell wall of Mycobacteria                                              | 0.135  | 0.159  | -0.041 | 542  | 457  | 460  | 770  |
| Coenzyme F420                                                          | 0.137  | 0.019  | 0.113  | 28   | 40   | 36   | 44   |
| ABC transporters                                                       | 0.141  | 0.012  | 0.065  | 201  | 251  | 252  | 299  |
| Fermentation                                                           | 0.156  | -0.025 | 0.009  | 465  | 508  | 613  | 656  |
| Type III secretion system extended                                     | 0.163  | 0.128  | 0.808  | 0    | 12   | 3    | 7    |
| YbbK                                                                   | 0.163  | 0.075  | 0.080  | 27   | 35   | 32   | 45   |
| Nitric oxide synthase                                                  | 0.177  | 0.341  | 0.172  | 51   | 77   | 34   | 112  |
| Adhesion                                                               | 0.178  | -0.049 | 0.119  | 129  | 206  | 211  | 221  |
| Transport of Molybdenum                                                | 0.184  | -0.004 | 0.105  | 4    | 6    | 6    | 7    |
| Glycoside hydrolases                                                   | 0.187  | 0.047  | -0.085 | 98   | 78   | 112  | 140  |
| Catabolism of an unknown compound                                      | 0.196  | 0.457  | 0.084  | 16   | 18   | 7    | 34   |
| Anaerobic degradation of aromatic compounds                            | 0.200  | -0.400 | 0.388  | 2    | 13   | 13   | 6    |
| Universal stress protein family                                        | 0.214  | 0.107  | 0.012  | 22   | 24   | 26   | 39   |
| Regulation of virulence                                                | 0.219  | 0.121  | -0.088 | 131  | 102  | 140  | 210  |
| Conjugative transposon Bacteroidales                                   | 0.219  | -0.980 | 0.405  | 0    | 2    | 3    | 0    |
| Cytochrome B6 F complex                                                | 0.225  | 0.047  | 0.095  | 2    | 3    | 3    | 4    |
| Bacteriophage structural proteins                                      | 0.234  | 0.117  | 0.349  | 2    | 7    | 4    | 7    |
| Selenoproteins                                                         | 0.236  | -0.089 | -0.005 | 123  | 145  | 215  | 204  |
| Soluble cytochromes and functionally related electron carriers         | 0.240  | -0.071 | -0.076 | 166  | 151  | 262  | 255  |
| Programmed Cell Death and Toxin antitoxin Systems                      | 0.245  | 0.171  | -0.061 | 40   | 34   | 42   | 72   |
| Tn52                                                                   | 0.276  | 0.310  | -0.054 | 18   | 15   | 15   | 37   |
| Sugar alcohols                                                         | 0.282  | 0.182  | -0.052 | 342  | 308  | 387  | 683  |
| Triacylglycerols                                                       | 0.307  | -0.027 | 0.139  | 8    | 17   | 19   | 22   |
| Di and oligosaccharides                                                | 0.316  | 0.163  | -0.119 | 444  | 321  | 534  | 878  |
| Electron transport and photophosphorylation                            | 0.324  | 0.230  | -0.028 | 6    | 6    | 7    | 14   |
| Archease                                                               | 0.331  | -0.276 | -0.010 | 2    | 3    | 6    | 4    |
| Antibacterial peptides                                                 | 0.335  | 0.065  | 0.576  | 0    | 6    | 3    | 5    |
| Biogenesis of cbb3 type cytochrome c oxidases                          | 0.336  | -0.518 | 0.206  | 6    | 33   | 53   | 21   |
| Coenzyme B                                                             | 0.348  | -0.138 | 0.498  | 0    | 4    | 3    | 3    |
| Denitrification                                                        | 0.349  | -0.427 | 0.223  | 12   | 69   | 102  | 51   |
| Gram Positive cell wall components                                     | 0.365  | 0.079  | -0.094 | 67   | 59   | 109  | 151  |
| Aminosugars                                                            | 0.383  | 0.072  | -0.069 | 119  | 119  | 212  | 292  |
| Cresol degradation                                                     | 0.391  | 0.143  | 0.529  | 0    | 2    | 1    | 2    |
| Two component regulatory systems in Campylobacter                      | 0.397  | 0.002  | -0.047 | 161  | 189  | 349  | 419  |
| Type III secretion system related                                      | 0.402  | 0.215  | 0.092  | 10   | 18   | 18   | 36   |
| Nitrate and nitrite ammonification                                     | 0.409  | -0.305 | 0.185  | 22   | 114  | 172  | 117  |
| Transport of Nickel and Cobalt                                         | 0.422  | -0.016 | 0.017  | 14   | 23   | 38   | 45   |
| Type III Type IV Type VI ESAT secretion systems                        | 0.425  | -0.030 | 0.037  | 219  | 402  | 644  | 746  |
| Sugar Phosphotransferase Systems PTS                                   | 0.428  | 0.098  | 0.023  | 16   | 25   | 36   | 54   |
| Bacterial Chemotaxis                                                   | 0.440  | -0.056 | -0.016 | 125  | 190  | 363  | 396  |
| Pseudomonas quinolone signal PQS                                       | 0.441  | 0.030  | -0.151 | 4    | 3    | 8    | 10   |
| cAMP signaling in bacteria                                             | 0.443  | 0.108  | 0.059  | 113  | 212  | 282  | 437  |
| CBSS 261594 1 peg 2640                                                 | 0.455  | 0.238  | 0.072  | 6    | 11   | 12   | 25   |
| ECF class transporters                                                 | 0.456  | 0.275  | -0.035 | 26   | 29   | 40   | 87   |
| Carbohydrates 1                                                        | 0.459  | 0.181  | -0.208 | 4    | 2    | 6    | 10   |

|                                                             |       |        |        |     |     |     |     |
|-------------------------------------------------------------|-------|--------|--------|-----|-----|-----|-----|
| Restriction Modification System                             | 0.461 | -0.219 | -0.003 | 102 | 202 | 444 | 358 |
| PA0057 cluster                                              | 0.478 | 0.704  | 0.591  | 0   | 2   | 0   | 3   |
| Luciferases                                                 | 0.478 | 0.704  | 0.591  | 0   | 2   | 0   | 3   |
| Flavohaemoglobin                                            | 0.480 | 0.044  | 0.390  | 0   | 5   | 4   | 6   |
| Orphan regulatory proteins                                  | 0.487 | 0.005  | 0.096  | 38  | 109 | 159 | 203 |
| Sporulation gene orphans                                    | 0.514 | -0.127 | -0.065 | 8   | 12  | 31  | 30  |
| CytR regulation                                             | 0.525 | -0.005 | 0.321  | 0   | 3   | 3   | 4   |
| Plant Octadecanoids                                         | 0.532 | 0.562  | 0.051  | 2   | 3   | 2   | 10  |
| Group II intron associated genes                            | 0.558 | -0.008 | 0.017  | 31  | 75  | 147 | 182 |
| Oxygen and light sensor PpaA PpsR                           | 0.563 | 0.043  | -0.021 | 6   | 11  | 23  | 31  |
| Quorum sensing and biofilm formation                        | 0.564 | -0.127 | -0.110 | 10  | 13  | 42  | 41  |
| Putative hemin transporter                                  | 0.566 | -0.148 | 0.227  | 0   | 7   | 10  | 10  |
| Sodium Ion Coupled Energetics                               | 0.573 | -0.617 | -0.007 | 2   | 15  | 49  | 20  |
| Bacterial hemoglobins                                       | 0.576 | -0.115 | 0.013  | 20  | 59  | 132 | 135 |
| Reductive Dechlorination                                    | 0.578 | -0.177 | -0.102 | 2   | 3   | 10  | 9   |
| Polysaccharides                                             | 0.590 | 0.104  | 0.030  | 38  | 98  | 173 | 266 |
| Galactosylceramide and Sulfatide metabolism                 | 0.594 | -0.132 | -0.129 | 16  | 20  | 73  | 71  |
| Listeria phi A118 like prophages                            | 0.596 | 0.035  | -0.027 | 2   | 4   | 9   | 12  |
| CRISPRs                                                     | 0.602 | -0.102 | -0.001 | 8   | 24  | 57  | 60  |
| Light harvesting complexes                                  | 0.615 | 0.423  | -0.011 | 2   | 3   | 4   | 12  |
| Dissimilatory nitrite reductase                             | 0.618 | -0.650 | 0.012  | 0   | 6   | 20  | 8   |
| Spore germination                                           | 0.619 | 0.102  | 0.236  | 0   | 7   | 8   | 13  |
| SigmaB stress response regulation                           | 0.647 | -0.029 | -0.055 | 29  | 64  | 180 | 215 |
| Putative sulfate assimilation cluster                       | 0.658 | -0.153 | 0.112  | 0   | 1   | 2   | 2   |
| Sulfate reduction associated complexes                      | 0.665 | -0.337 | -0.074 | 6   | 23  | 88  | 63  |
| Streptococcus pyogenes Virulome                             | 0.673 | 0.264  | 0.088  | 2   | 10  | 14  | 30  |
| CBSS 214092 1 peg 3450                                      | 0.674 | -0.389 | 0.022  | 0   | 1   | 3   | 2   |
| Spore Coat                                                  | 0.744 | 0.409  | 0.174  | 0   | 2   | 2   | 6   |
| Nitrosative stress                                          | 0.751 | -0.211 | -0.020 | 0   | 14  | 47  | 43  |
| Lipid derived mediators                                     | 0.775 | -0.064 | -0.006 | 0   | 2   | 6   | 7   |
| Tetrathionate respiration                                   | 0.790 | -0.331 | -0.105 | 0   | 4   | 21  | 16  |
| Proteolytic pathway                                         | 0.836 | 0.583  | 0.112  | 0   | 3   | 3   | 13  |
| Lacto N Biose I and Galacto N Biose Metabolic Pathway       | 0.839 | 0.445  | 0.068  | 0   | 2   | 3   | 9   |
| Toxins and superantigens                                    | 0.852 | 0.425  | 0.045  | 0   | 7   | 12  | 34  |
| AMP to 3 phosphoglycerate                                   | 0.860 | -0.869 | -0.352 | 0   | 0   | 3   | 1   |
| Acid stress                                                 | 0.870 | -0.018 | -0.110 | 0   | 3   | 16  | 20  |
| Nitrogen fixation                                           | 0.899 | -0.114 | -0.174 | 0   | 7   | 65  | 70  |
| Carbon monoxide induced hydrogenase                         | 0.920 | -0.238 | -0.238 | 0   | 4   | 89  | 80  |
| Bacillus biofilm matrix protein component TasA and homologs | 0.924 | -0.448 | -0.305 | 0   | 0   | 6   | 4   |
| Siderophore Enterobactin                                    | 0.962 | 1.070  | 0.103  | 0   | 1   | 0   | 7   |
| IbrA and IbrB co activators of prophage gene expression     | 0.967 | -0.167 | -0.274 | 0   | 0   | 2   | 2   |
| Flavocytochrome C                                           | 0.967 | -0.167 | -0.274 | 0   | 0   | 1   | 1   |
| Sporulation Cluster III A                                   | 1.183 | 1.236  | -0.119 | 0   | 0   | 0   | 1   |
