# Supplementary material for: A Metagenomics Transect into the Deepest Point of the Baltic Sea Reveals Clear Stratification of Microbial Functional Capacities
Source: PubMed Central journal article supplement (PMC3781128; doi:10.1371/journal.pone.0074983), 2013-09-23
Supplement: pone.0074983.s012.pdf [file pone.0074983.s012.pdf]

## Text S1

### Materials and Methods

#### *Sampling*

Water was sampled from three distinct zones, the surface water at 10-20 m, the mixed layer at 70-80 m and the anoxic zone at 400-410 m depth, using 5L Niskin bottles 3 for each depth, attached to a CTD line and wired down for sampling twice, pooled into 25L PVC containers and pumped through tygon tubes (Saint-Gobain Performance Plastics Akron, USA) to GE 3 µm Polycarbonate 3 µm 47 mm prefilters (GE Healthcare, Uppsala, SWEDEN) and Sterivex GS 0.22 µm filter units (Millipore, USA) with a Gilson minipuls evolution peristaltic pump (PRETECK instruments, SWEDEN) at maximum flowrate. Sterivex filters were immediately immersed in 1.8 ml of lysis buffer (750 mM sucrose, 50 mM EDTA, 50 mM Tris-HCl, pH 8.0, 400 mM NaCl) frozen onboard and transferred on dry ice to laboratory where stored in -80°C until extraction. All equipment and solutions used were sterilised by autoclavation and sterile sealed prior to use, 25L PVC water containers were rinsed with seawater from corresponding depth.

#### *DNA extraction*

Total DNA was extracted from 200 mg triplicate sediment aliquots using the FastDNA® SPIN Kit for Soil (MP Biomedicals, Solon, OH, USA) following the manufacturer's instructions. For maximal extraction, each sediment aliquot was re-extracted twice and additional washes with 5.5 M guanidine thiocyanate (Sigma Aldrich, St. Louis, MO, USA) were included to enhance removal of humic acids. The DNA was further purified using the QIAGEN Genomic-tip 20/G (QIAGEN, Valencia, CA, USA).

DNA from water samples was extracted from the sterivex filters by the method of Somerville et al with the following modifications; 180 µl freshly made lysozyme (9 mg/ml in 50 µl of Tris-HCl pH 8) was added to the filters and the syringe end was sealed with parafilm and incubated for 1 h at 37°C in a rotating carousel at 27 rpm. 55 µl Proteinase K (20 mg/ml in 50 µl of Tris-HCl pH 8) and 200 µl sodium dodecyl sulfate (10%) was added, incubated at 55°C for 3.5 h in a rotating carousel at 27 rpm and lysate was drawn into a syringe. Filters were washed with 1 ml of lysis buffer, pooled with the lysate and divided into eppendorf tubes (total 1 ml/ tube). 166 µl 3.0 M NaAcetate (pH 5.2) and 0.66 ml isopropanol was added to the mixture and incubated in -20°C overnight. Samples were centrifuged at 11000 rpm 30 min, resuspended in 133 µl xTE and incubated 1 h 37°C, pooled in one tube and extracted twice with 500 µl of phenol-chloroform-isoamyl alcohol (25:24:1) and once with 600 µl of chloroform-isoamyl alcohol (24:1) and precipitated with 1/10 volume NaAcetate and 2.5 volume 100% EtOH in -20°C overnight then centrifuged at 11000 rpm 4°C for 30 min. and washed twice in 70% EtOH, centrifuged at 11000 rpm 4°C for 30 min. Precipitated DNA was dried in speedvac and resuspended in 50 µl of 10 mM Tris-Cl, pH 8.5. DNA quality was evaluated with NanoDrop ND-1000 (Thermo Fisher Scientific Inc., Waltham, MA, USA), Concentrations were determined by the

Qubit BR DNA assay (Invitrogen, Carlsbad, CA, USA) using the Qubit Fluorometer (Invitrogen).

*Global comparative metagenomic analyses*

For comparison of the Landsort Deep data with other metagenomes, a number of publicly available larger metagenomic datasets were selected. The metagenomes were retrieved from the NCBI short read archive (SRA) and the INSDC short reads archive under the following accession numbers:

| Site                  | Sample         | Accession number |
|-----------------------|----------------|------------------|
| HOT186                | 25m            | SRX007372        |
|                       | 75m            | SRX007369        |
|                       | 110m           | SRX007370        |
|                       | 500m           | SRX007371        |
| BATS216               | 20m            | SRX008032        |
|                       | 50m            | SRX008033        |
|                       | 100m           | SRX008035        |
|                       | 500m           | SRX007384        |
| Marmara Sea           | 1000m          | SRX017437        |
|                       | 1300m sediment | SRX017438        |
| Western Channel       | jan day        | ERR010482        |
|                       | apr day        | ERR010489        |
|                       | aug 4pm        | ERR010498        |
| Chile OMZ station 3   | 70m            | SRX029170        |
|                       | 200m           | SRX029171        |
|                       | 80m            | SRX029172        |
|                       | 150m           | SRX029173        |
| Mediterranean DCM 50m | 50 m           | SRP002017        |
| Waseca farm soil      |                | AAFX01000000     |
| Switchgrass compost   |                | SRX014898        |
| Tonya seep sediment   | 0-4cm bsf      | SRX041231        |
|                       | 10-15cm bsf    | SRX041232        |
| Puerto Rico Trench    | 6000 m         | SRX039182        |
